# Supplementary material for: Palladium(II)-Catalyzed Regioselective Ortho Arylation of sp2 C—H Bonds of N-Aryl-2-amino Pyridine Derivatives
Source: PubMed Central journal article supplement (PMC3483625; doi:10.1002/cctc.201200155), 2012-06-13

Heterogeneous & Homogeneous & Bio-

# CHEMCATCHEM

---

CATALYSIS

## Supporting Information

© Copyright Wiley-VCH Verlag GmbH & Co. KGaA, 69451 Weinheim, 2012

### **Palladium(II)-Catalyzed Regioselective *Ortho* Arylation of $sp^2$ C–H Bonds of *N*-Aryl-2-amino Pyridine Derivatives**

Moumita Koley, Navid Dastbaravardeh, Michael Schnürch,\* and Marko D. Mihovilovic<sup>[a]</sup>

cctc\_201200155\_sm\_miscellaneous\_information.pdf

N-([1,1'-biphenyl]-2-yl)pyridin-2-amine (12a):

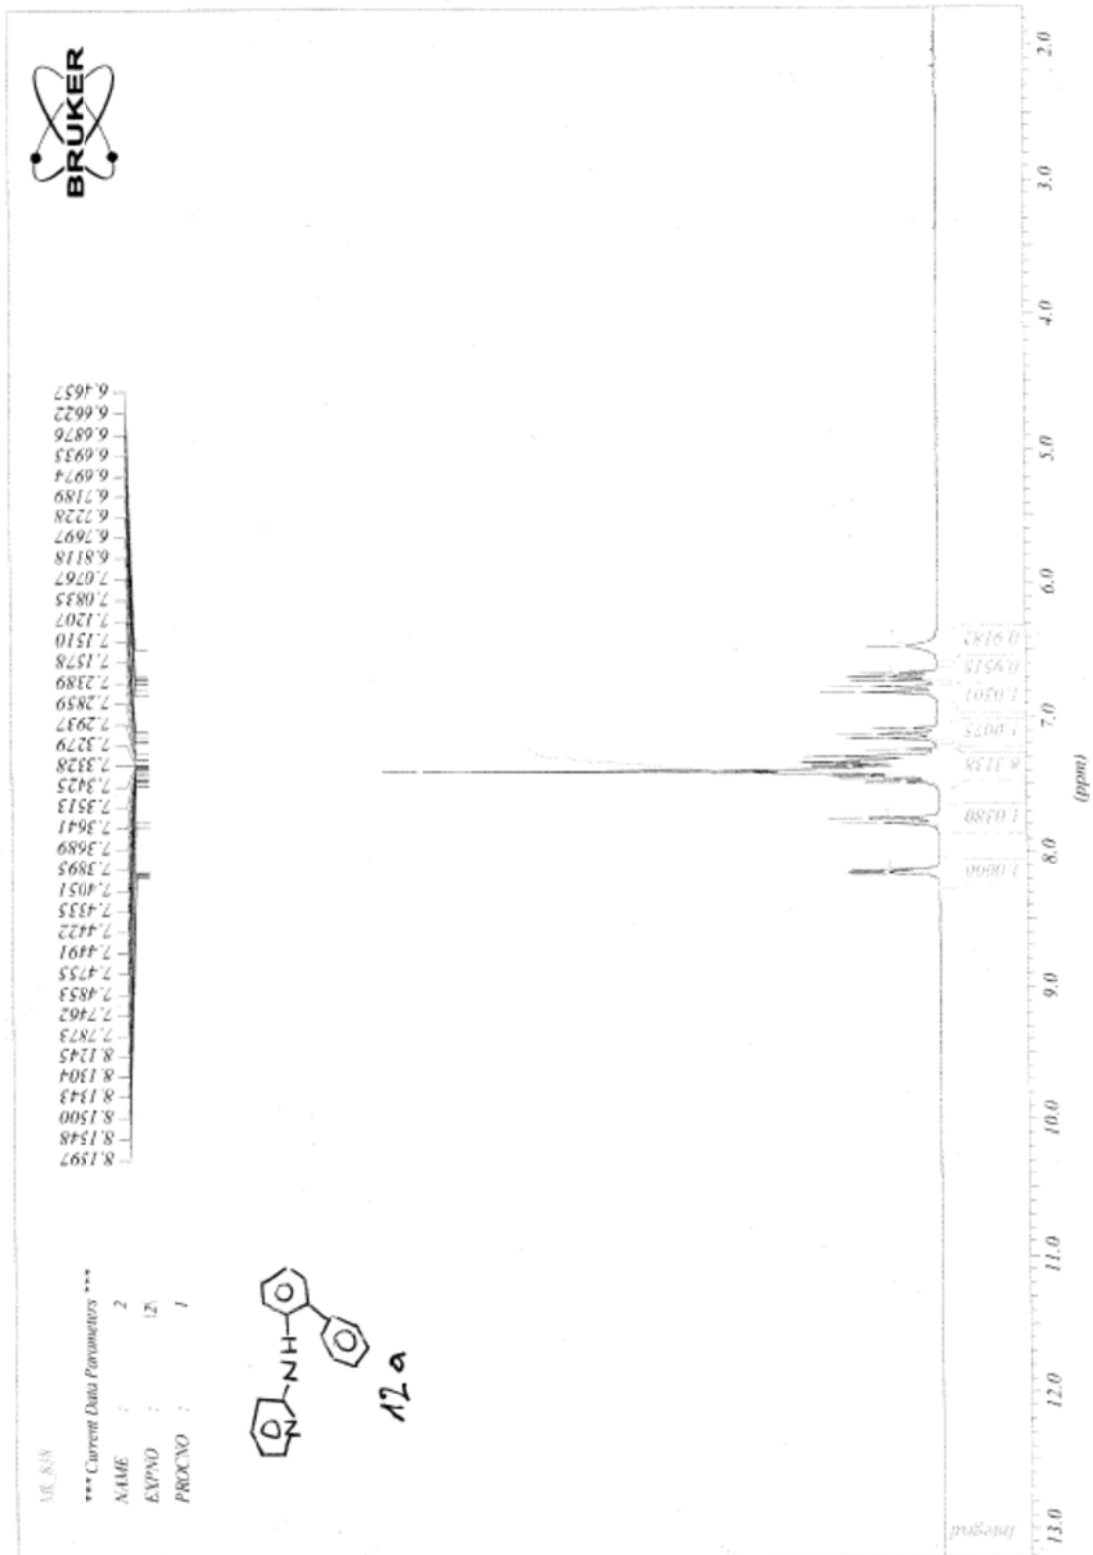

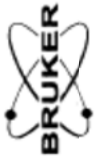

\*\*\* Current Data Parameters \*\*\*  
NAME : H  
EXPNO : H  
PROCNO : 1

MR\_331\_2F

- 155.8969
- 148.4077
- 138.7918
- 137.6126
- 137.4511
- 133.3170
- 130.7831
- 129.3092
- 128.8529
- 128.2282
- 127.5755
- 122.9430
- 120.5986
- 115.0747
- 108.6173

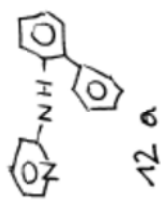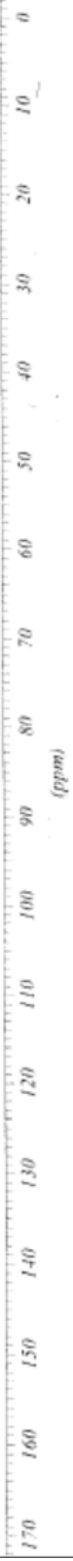

N-(4'-methyl-[1,1'-biphenyl]-2-yl)pyridin-2-amine (12b):

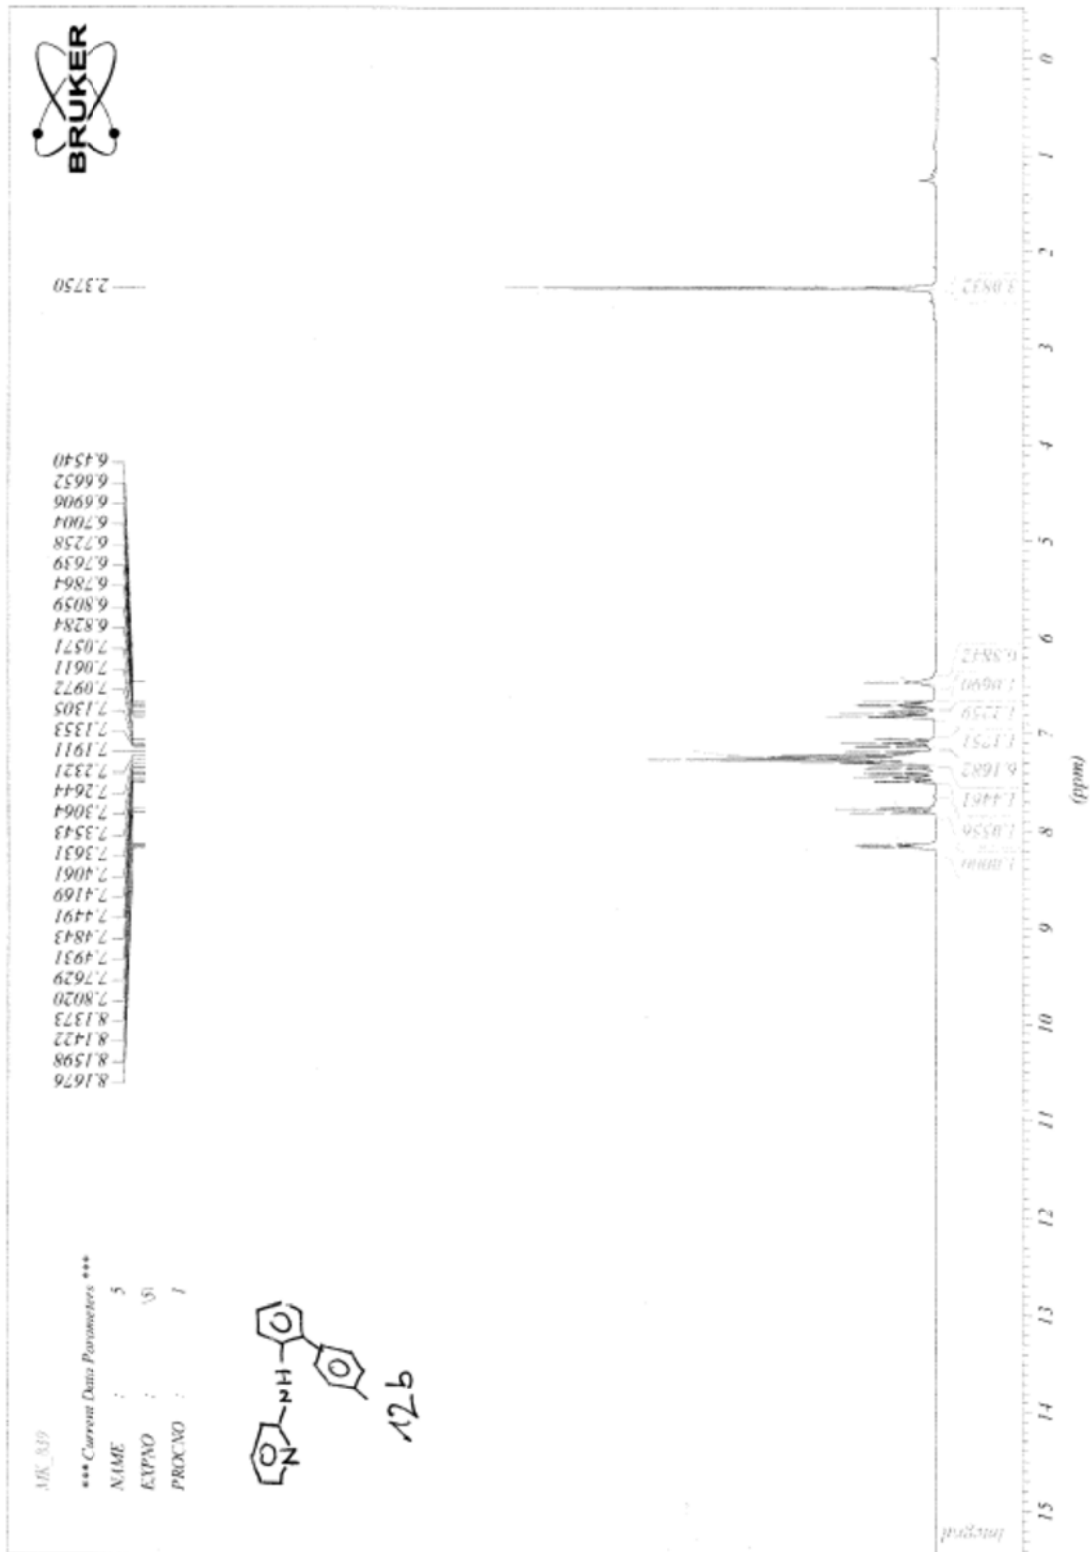

16K 332

\*\*\* Current Data Parameters \*\*\*

NAME : 6  
EXPNO : 16  
PROCNO : 1

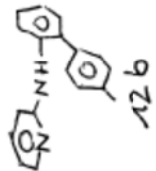

155.9601  
148.3024  
137.6617  
137.4722  
137.3248  
135.7736  
133.3802  
130.7691  
129.5689  
129.1618  
128.0247  
122.9500  
120.6267  
114.9835  
108.5752

21.1893

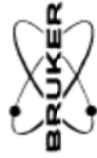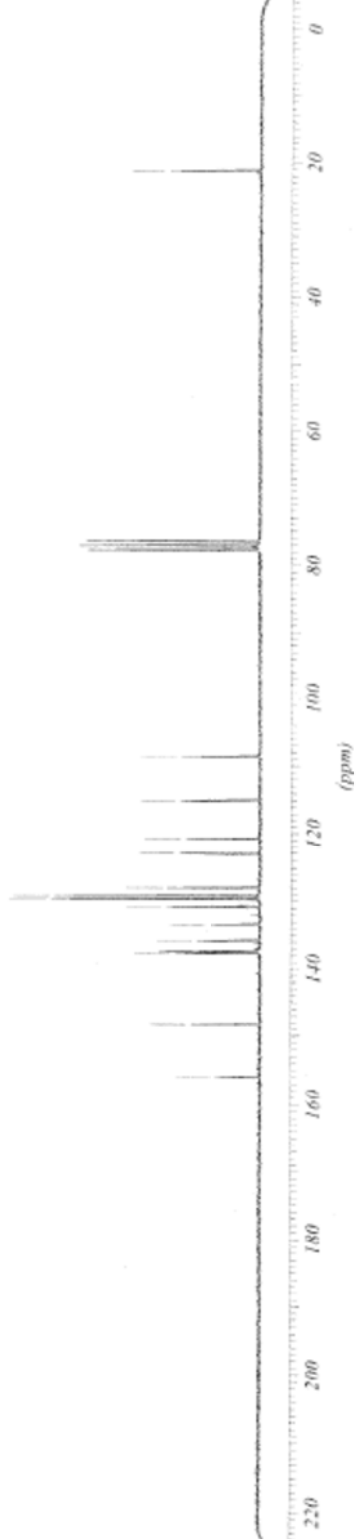

N-(4'-(*tert*-butyl)-[1,1'-biphenyl]-2-yl)pyridin-2-amine (12c):

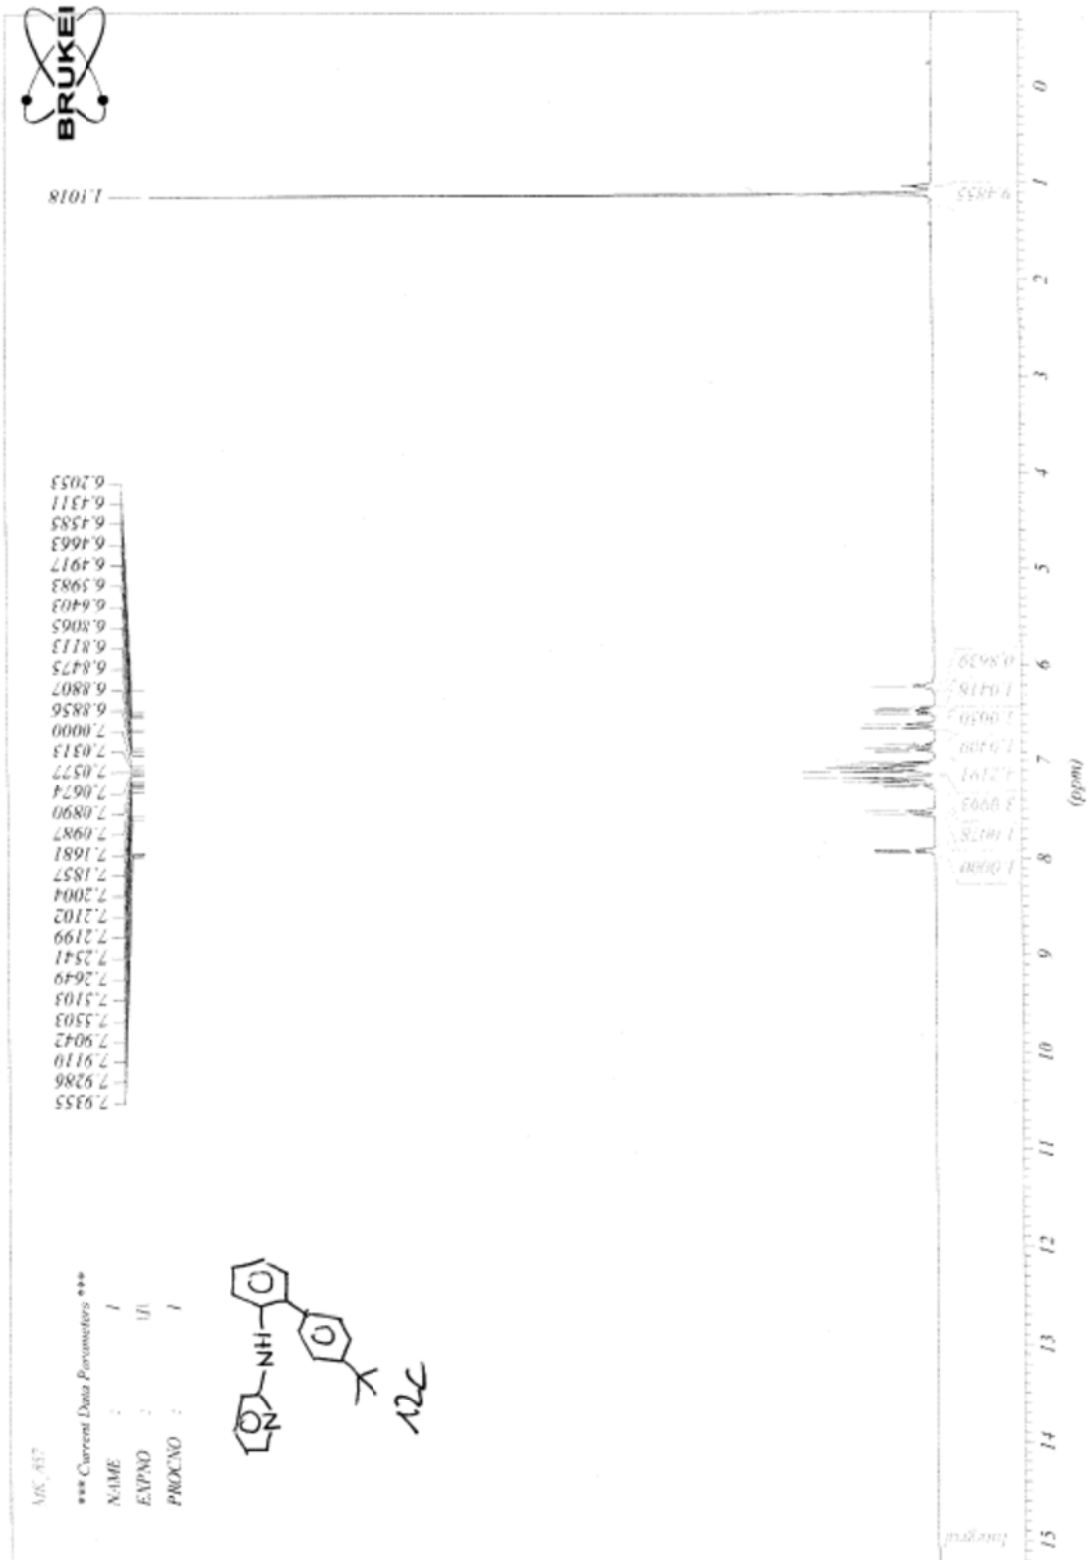

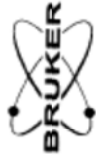

34.6025  
31.3457

155.9250  
150.4643  
148.3586  
137.6617  
137.4933  
135.6894  
133.1696  
130.8674  
128.9512  
127.9756  
125.8067  
122.8798  
120.3530  
115.0256  
108.6594

Product  
\*\*\* Current Data Parameters \*\*\*  
NAME : 2  
EXPNO : 121  
PROCNO : 1

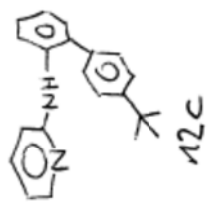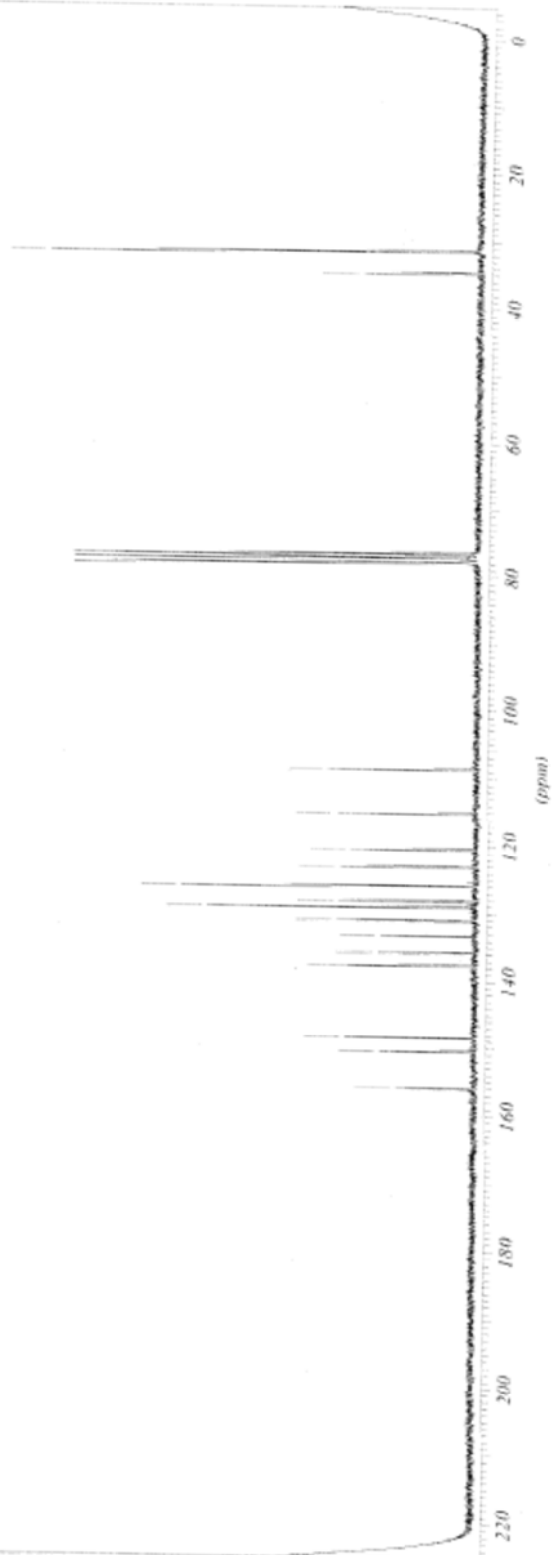

N-(4'-chloro-[1,1'-biphenyl]-2-yl)pyridin-2-amine (12d):

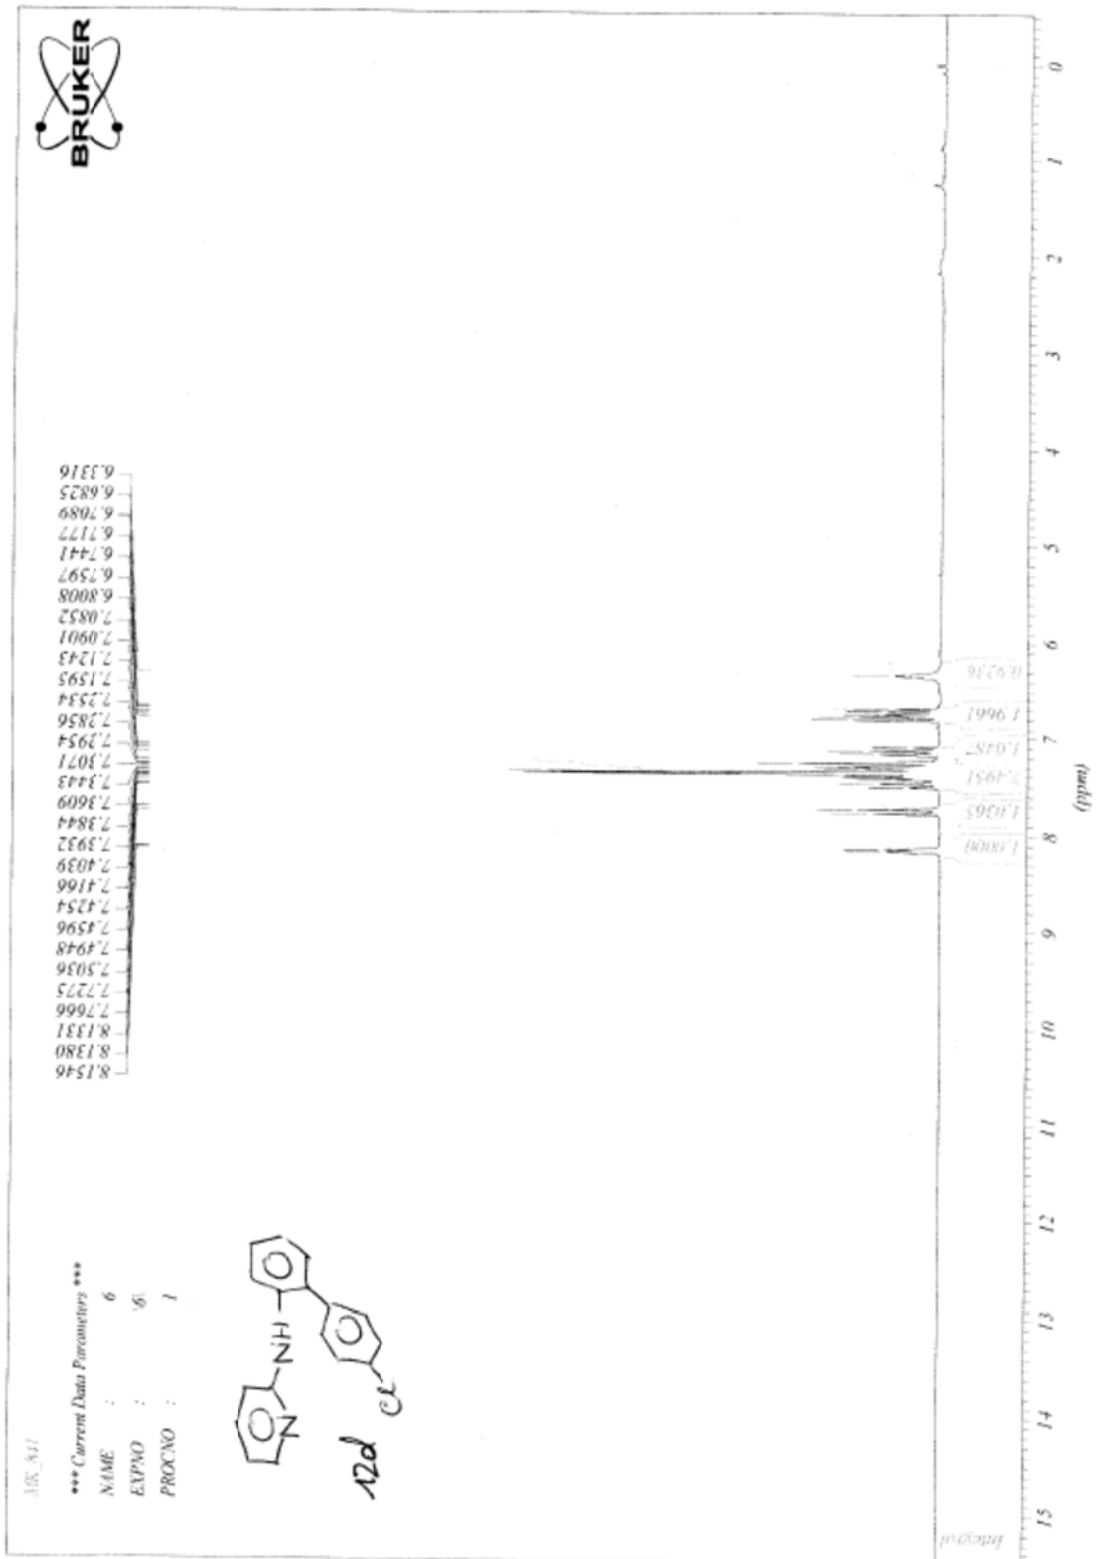



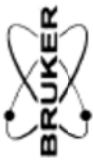

155.8478  
148.4147  
137.7249  
137.3739  
137.2546  
133.6258  
132.5028  
130.6779  
130.6428  
129.0284  
128.6143  
123.5571  
121.5005  
115.1870  
108.4278

\*\*\* Current Data Parameters \*\*\*  
NAME : 7  
EXPNO : 171  
PROCNO : 1

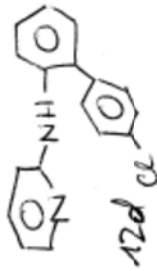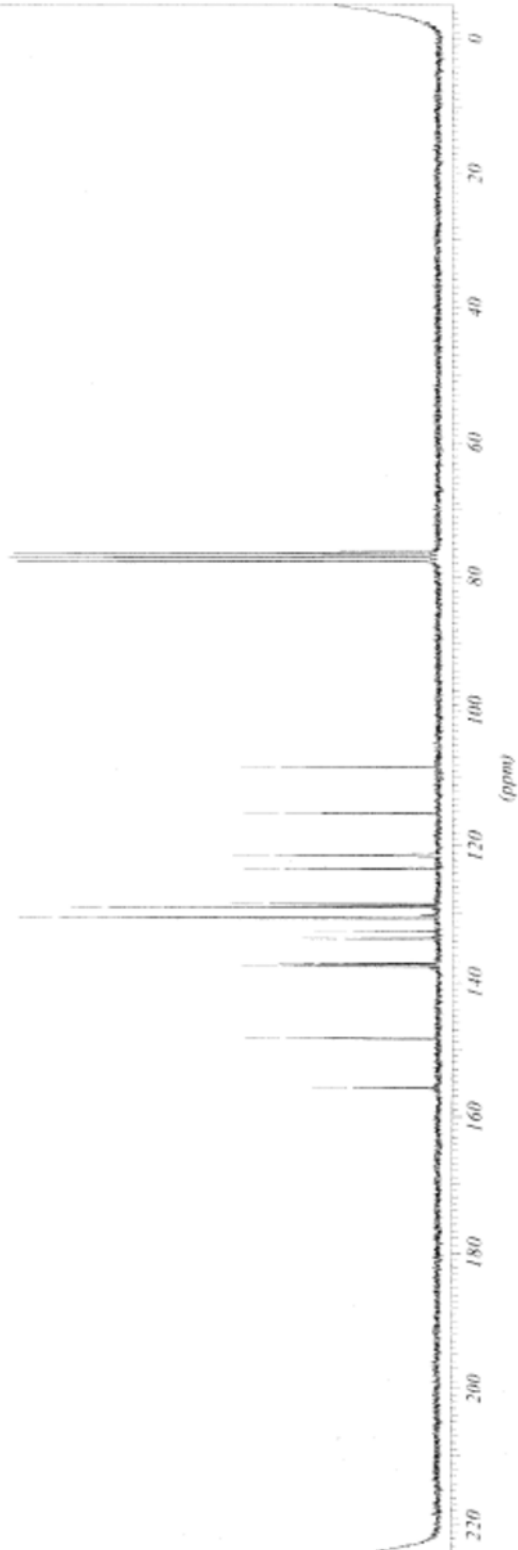

N-(3'-nitro-[1,1'-biphenyl]-2-yl)pyridin-2-amine (12e):

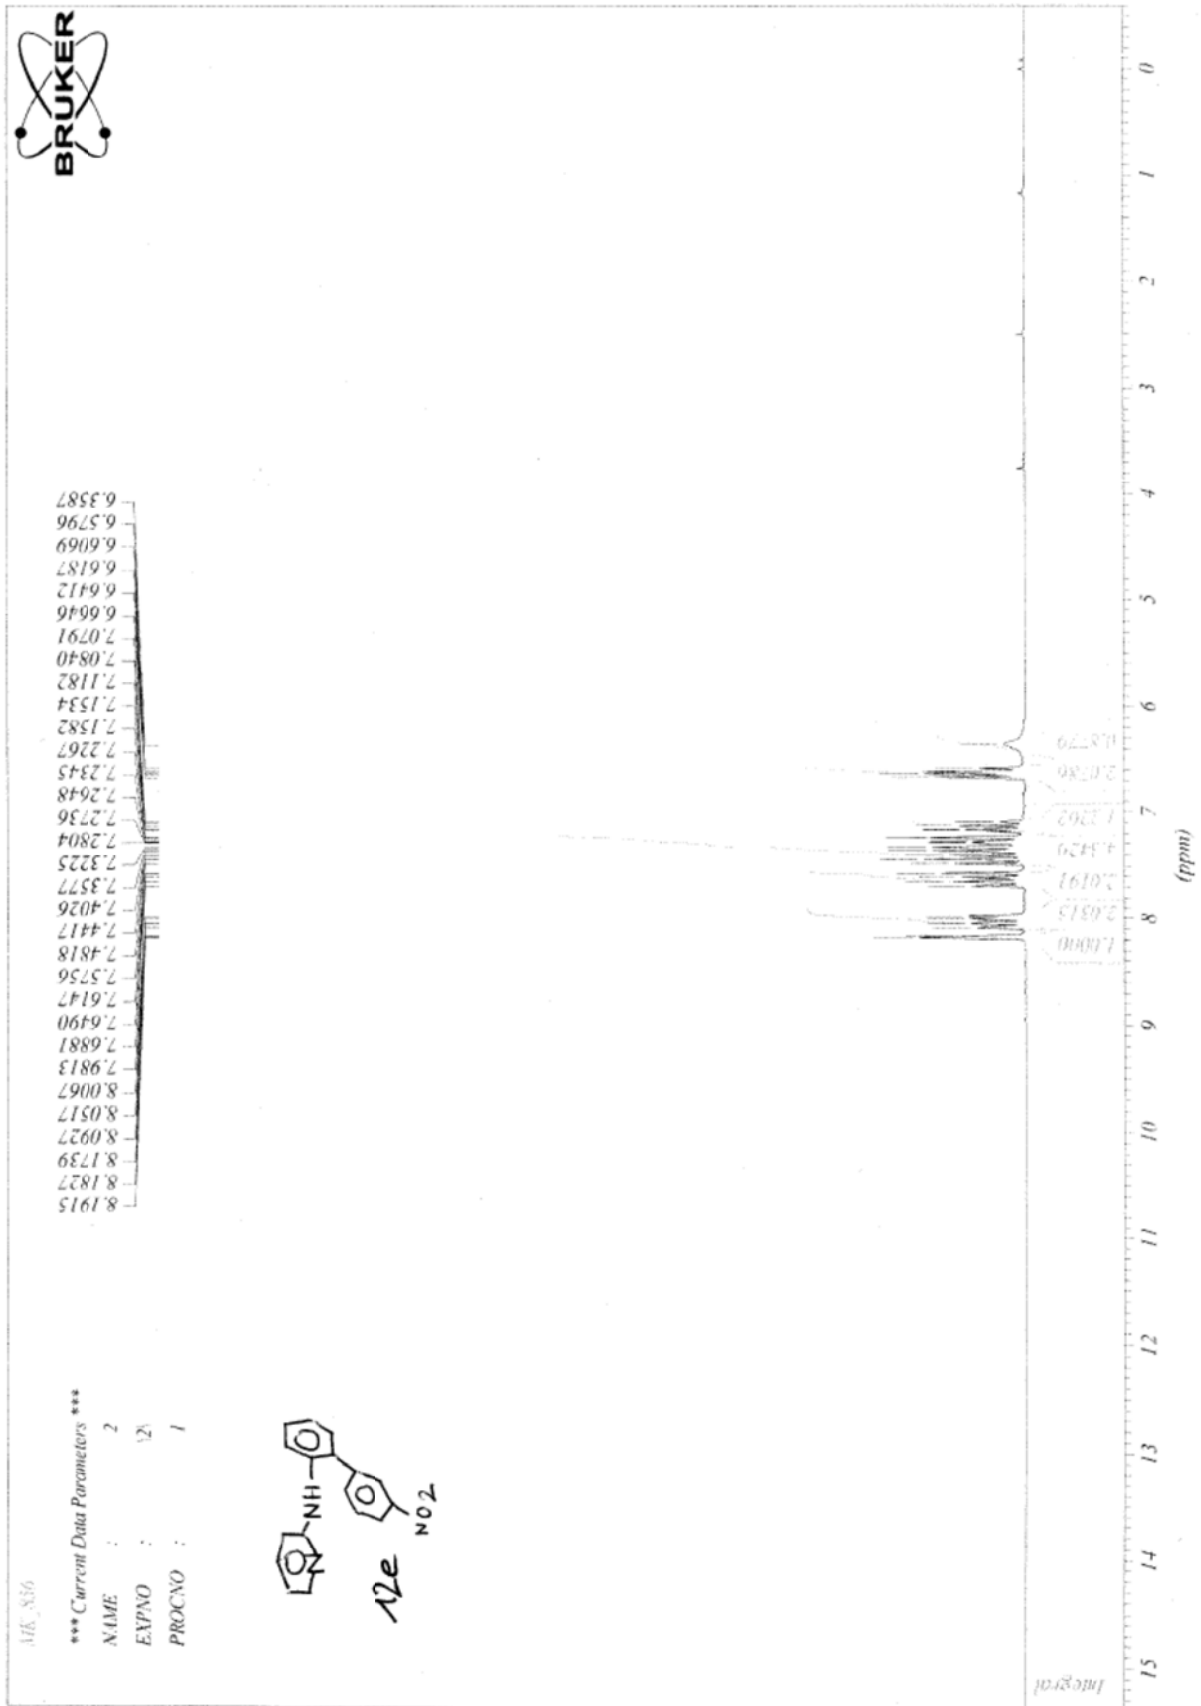

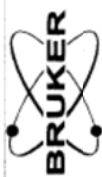

MAK 856

\*\*\* Current Data Parameters \*\*\*

NAME : 3  
EXPNO : 3  
PROCNO : 1

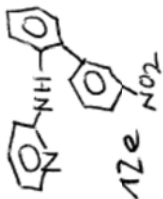

155.8829  
148.5341  
148.3796  
140.7851  
137.8091  
137.4511  
135.3806  
132.1659  
130.7902  
129.5689  
129.4987  
124.2204  
122.6552  
122.3674  
115.3204  
108.3085

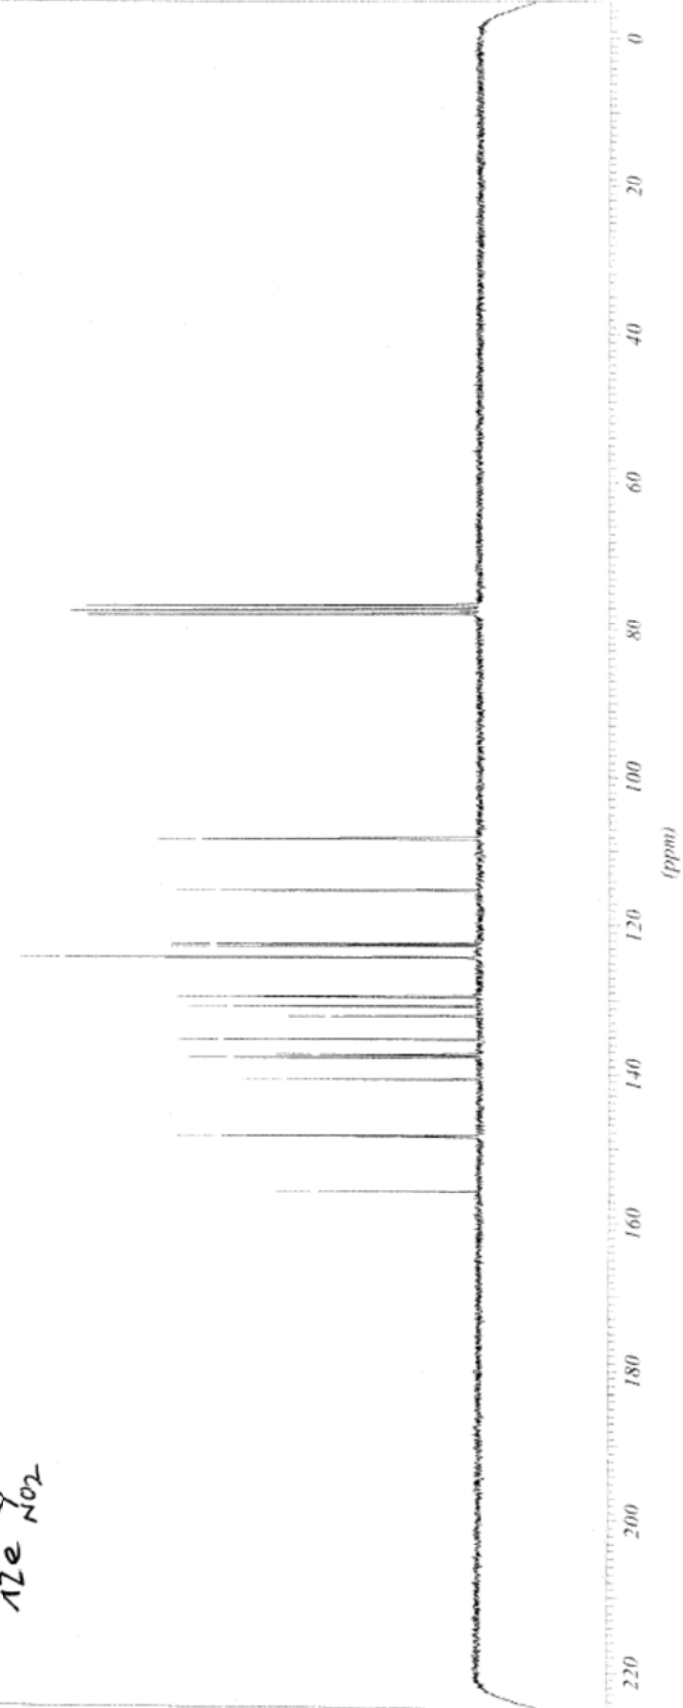

N-(5-methoxy-[1,1'-biphenyl]-2-yl)pyridin-2-amine (12f):

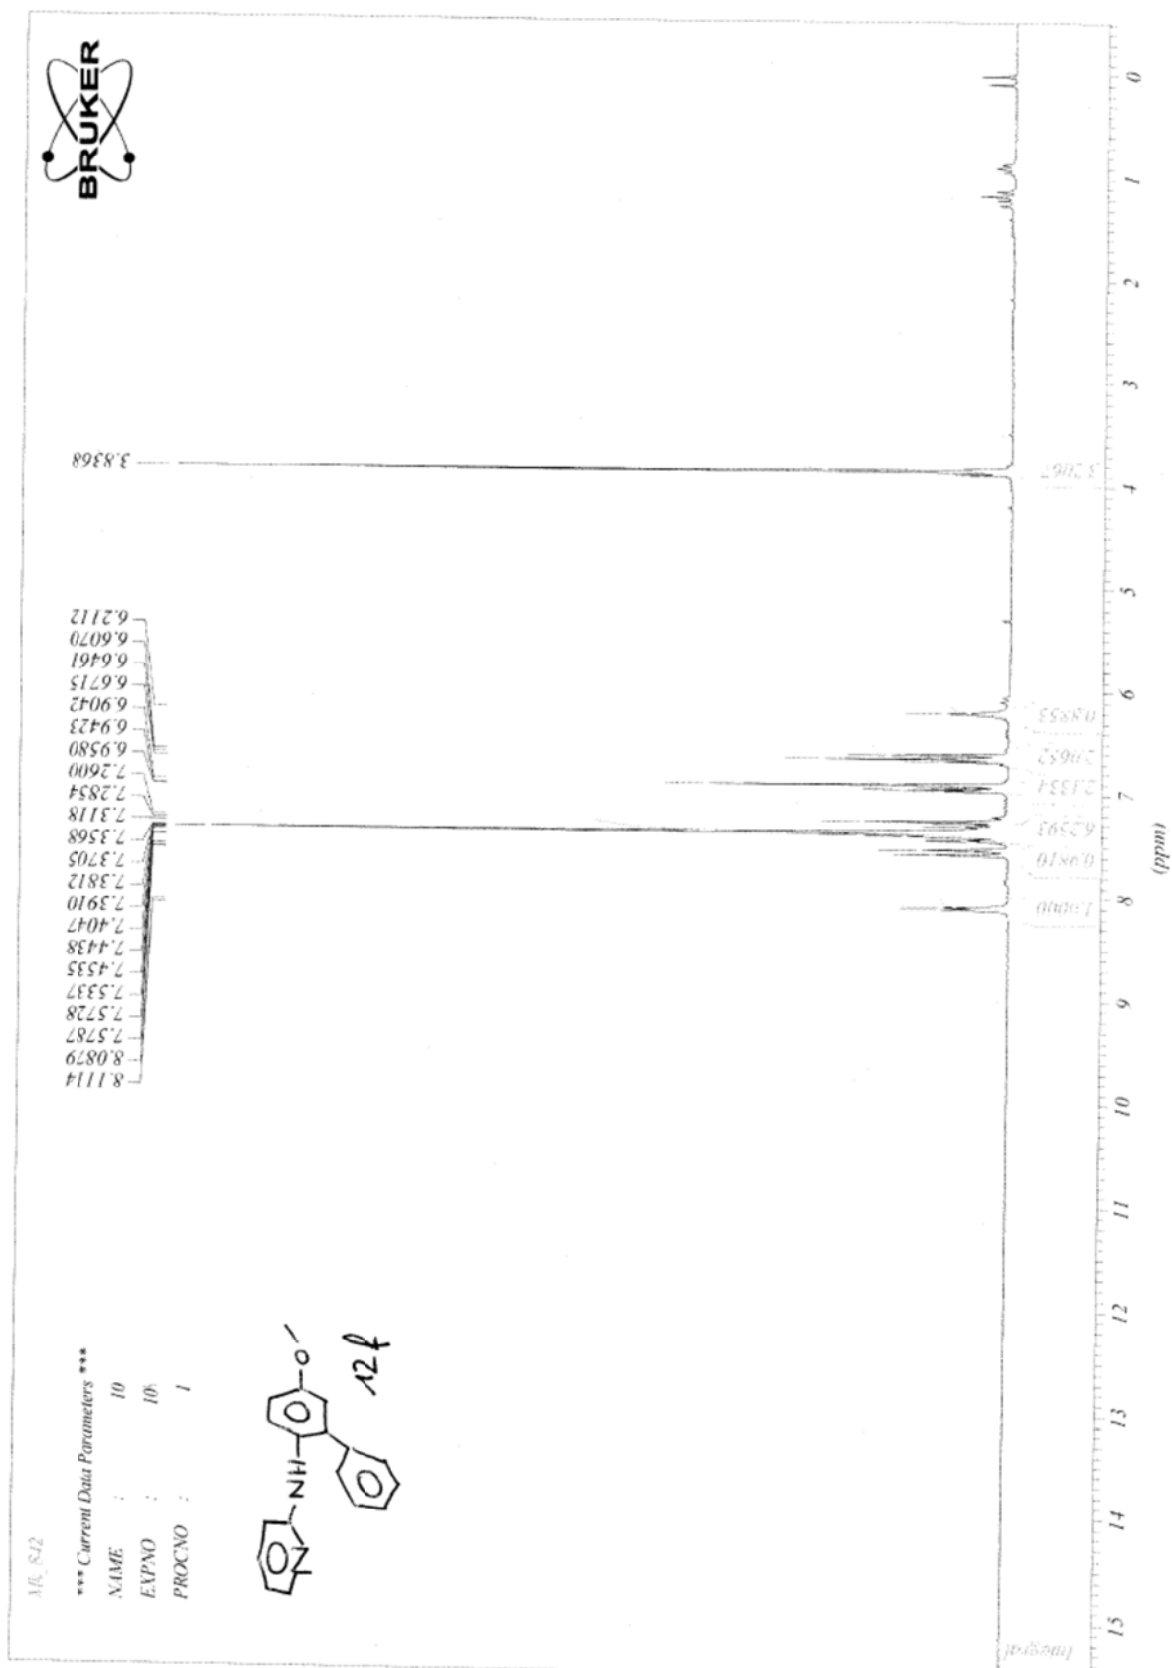

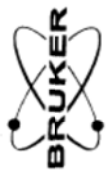

AME\_8-12

\*\*\* Current Data Parameters \*\*\*

NAME : 11  
EXPNO : 11  
PROCNO : 1

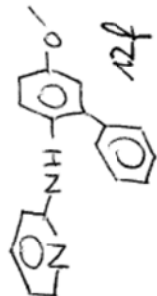

- 157.1323
- 156.2900
- 148.1972
- 138.8479
- 137.6477
- 136.8545
- 130.1935
- 129.0635
- 128.6494
- 127.5895
- 125.1399
- 115.8258
- 114.2184
- 113.8464
- 107.4522
- 55.5891

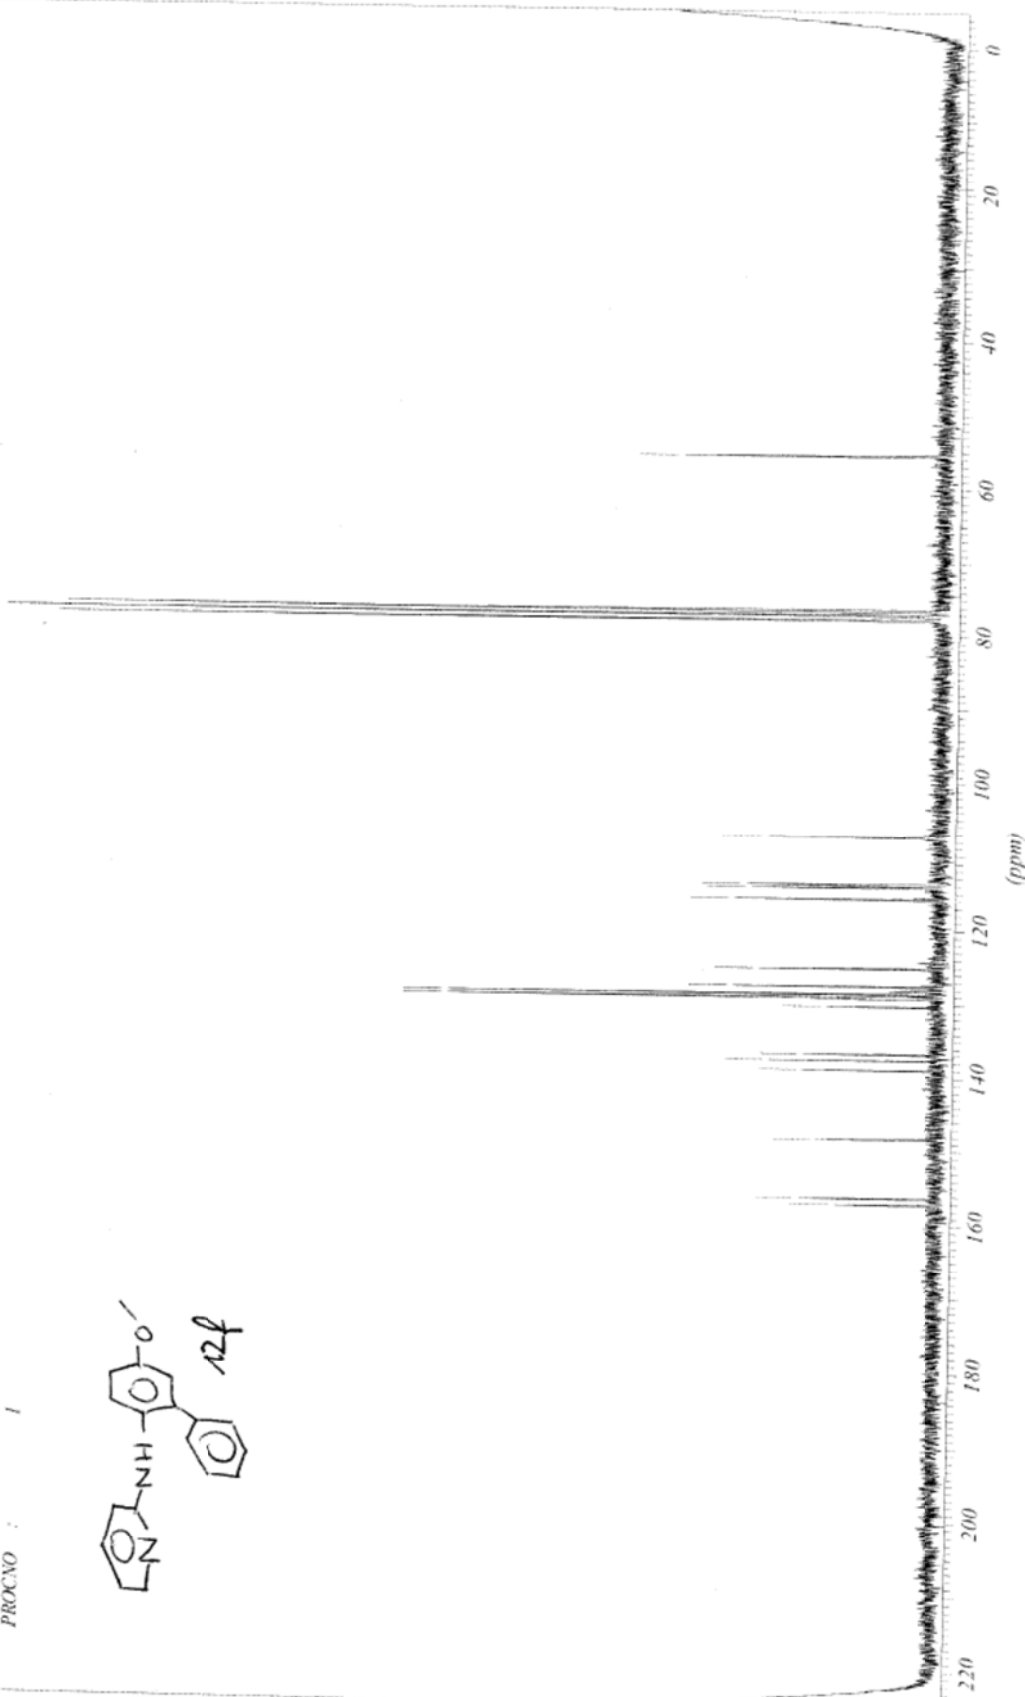

N-(5-methoxy-4'-methyl-[1,1'-biphenyl]-2-yl)pyridin-2-amine (12g):

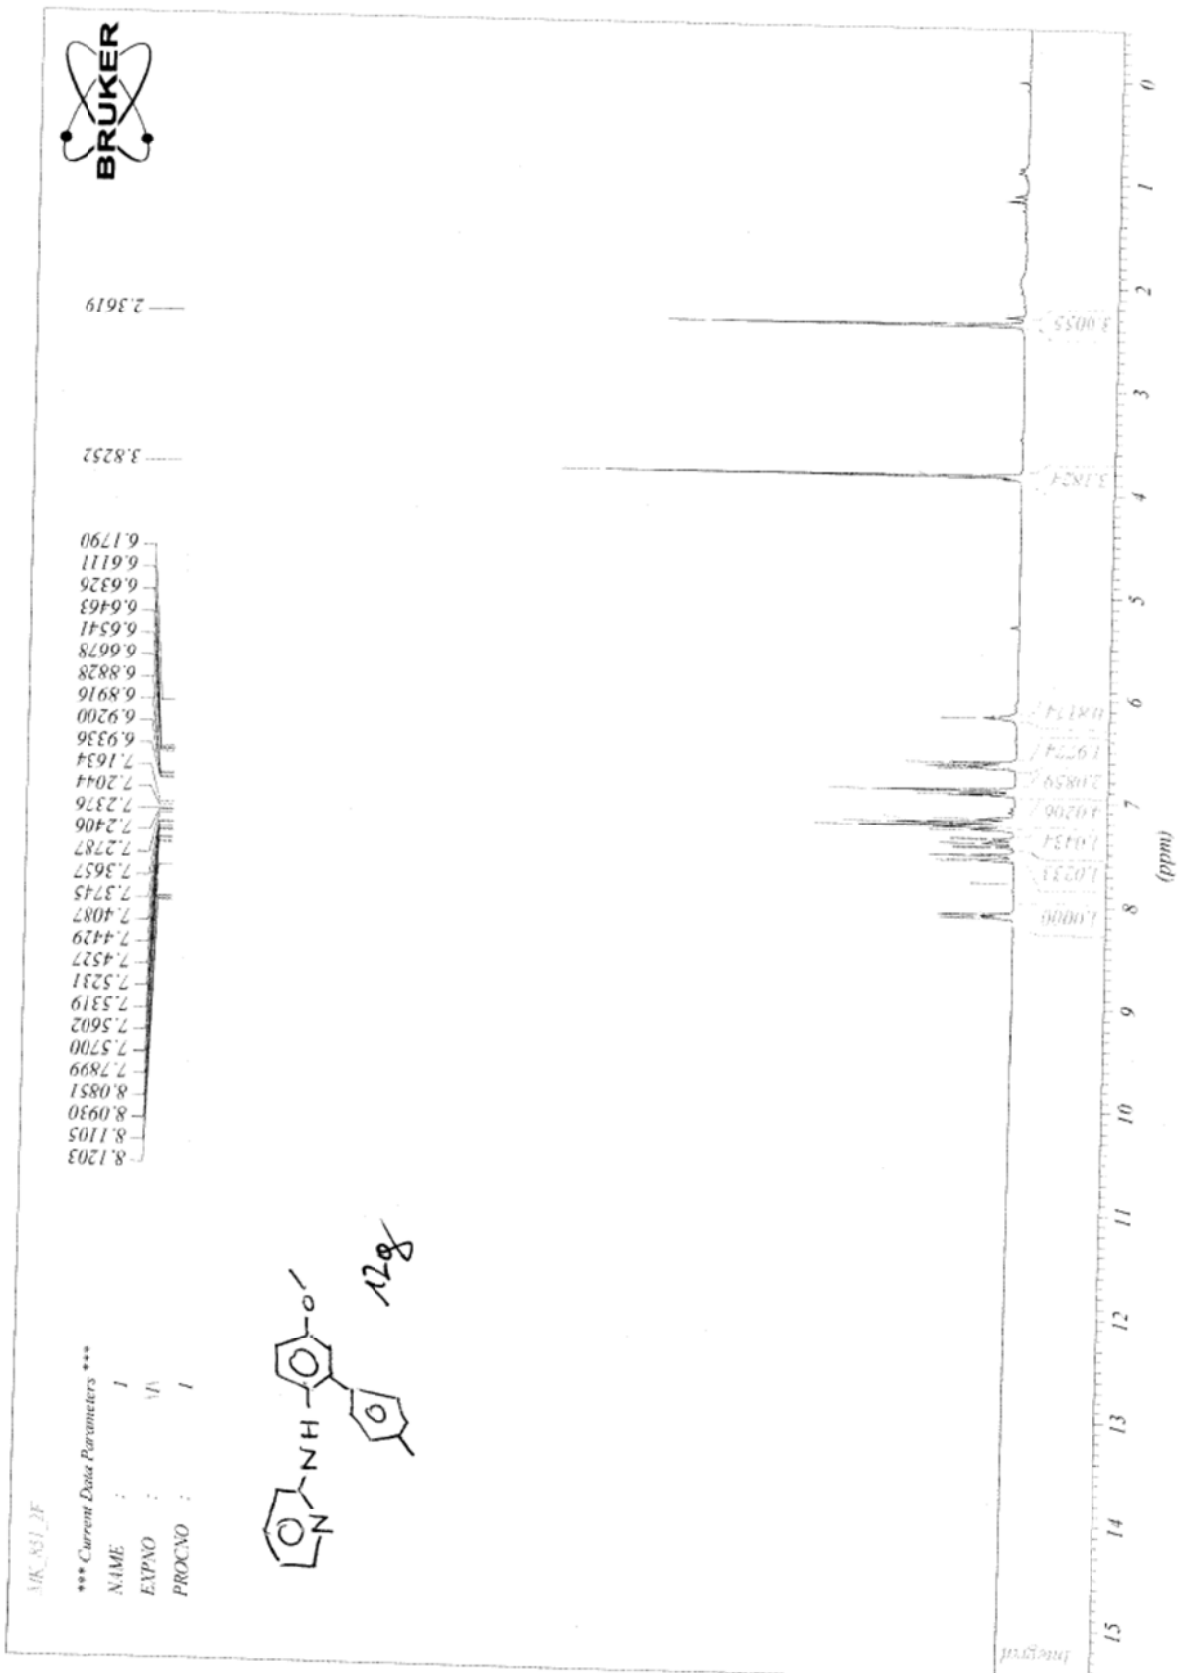

MK\_551

\*\*\* Current Data Parameters \*\*\*  
NAME : 3  
EXPNO : 131  
PROCNO : 1

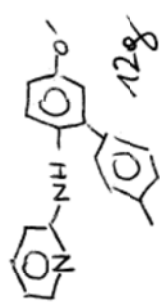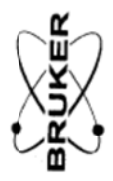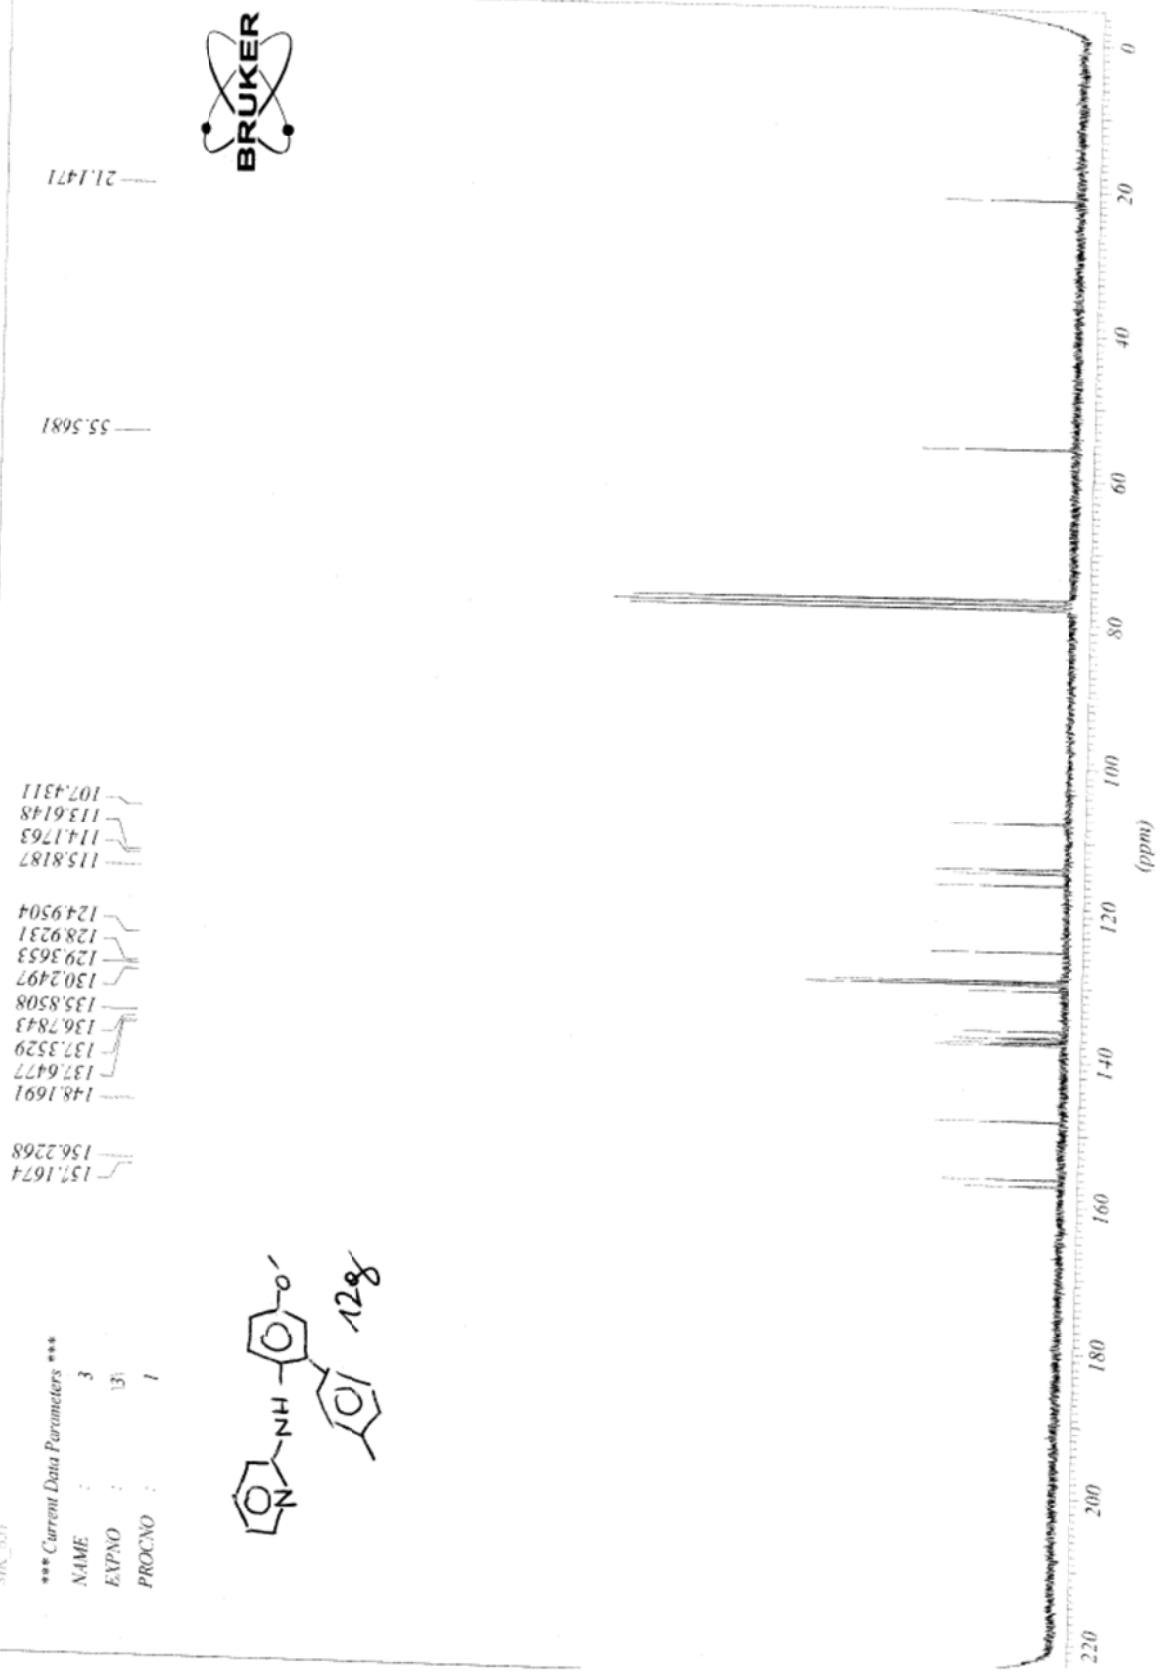

**N-(5-methoxy-3'-nitro-[1,1'-biphenyl]-2-yl)pyridin-2-amine (12h):**

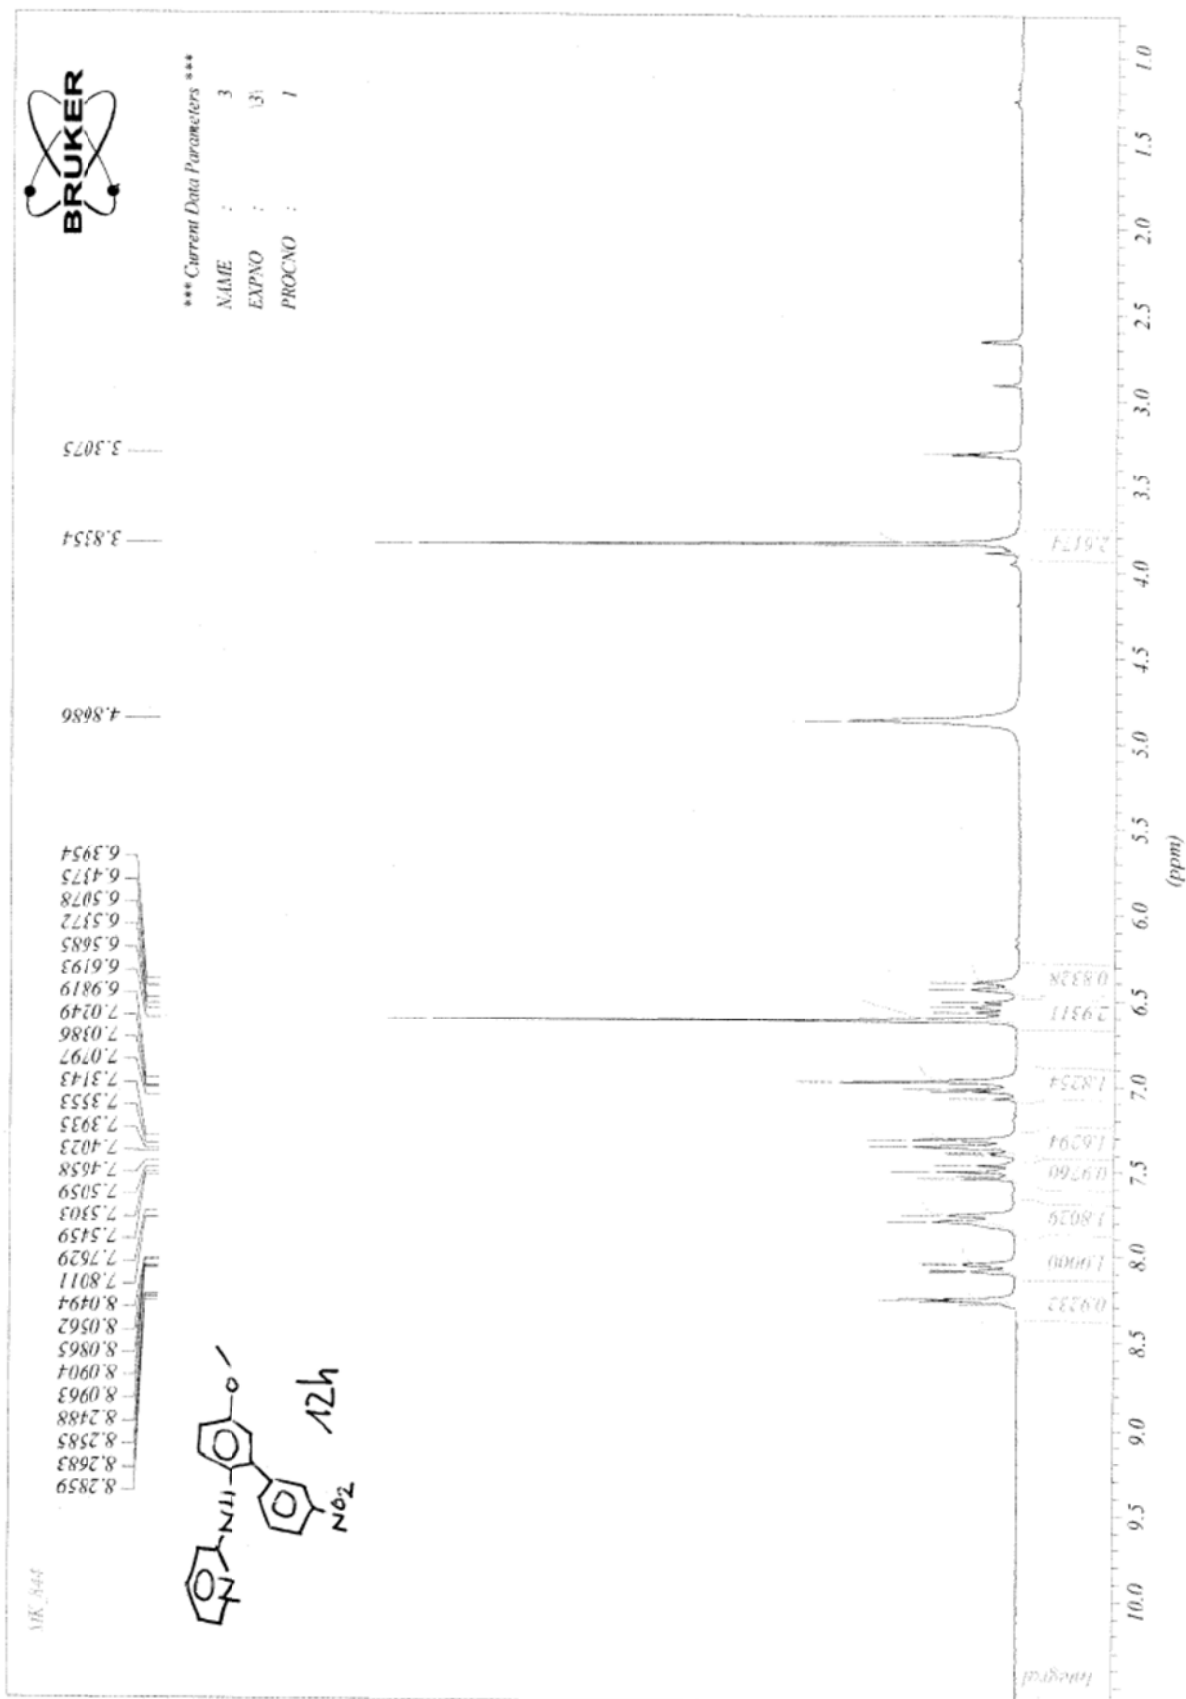



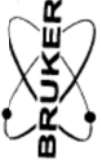

MK 844

\*\*\* Current Data Parameters \*\*\*

NAME : KOSBIB-1  
EXPNO : 4  
PROCNO : 1

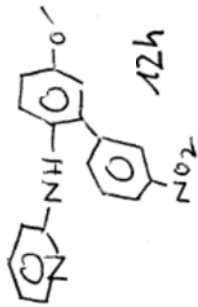

- 159.3526
- 151.2528
- 149.4138
- 148.0942
- 142.7949
- 139.1942
- 138.8081
- 136.3936
- 131.2698
- 130.3713
- 130.2871
- 124.8264
- 122.9453
- 116.8388
- 116.0176
- 114.6840
- 109.7356

56.1318

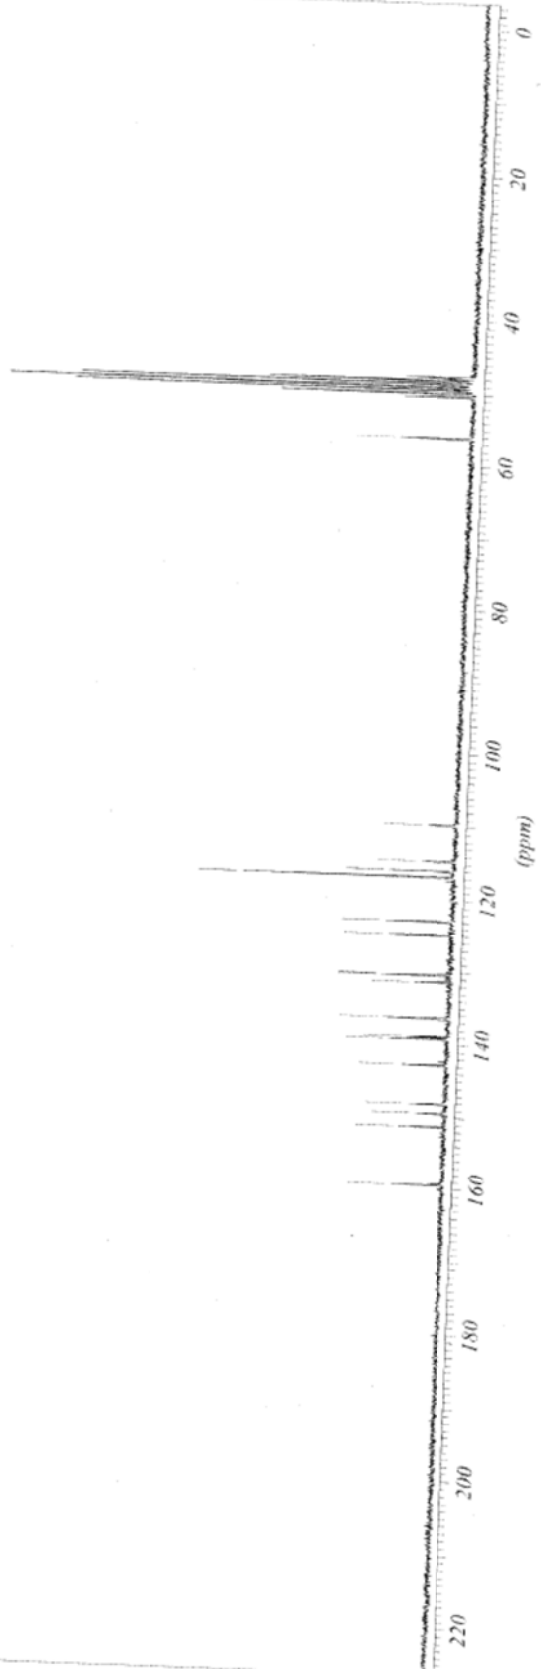

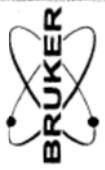

56.1318

- 159.3526
- 151.2528
- 149.4138
- 148.0942
- 142.7949
- 139.1942
- 138.8081
- 136.3936
- 131.2698
- 130.3713
- 130.2871
- 124.8264
- 122.9453
- 116.8388
- 116.0176
- 114.6840
- 109.7356

\*\*\* Current Data Parameters \*\*\*  
NAME : K05B08-1  
EXPNO : 4  
PROCNO : 1

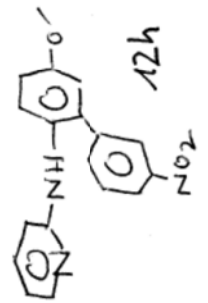

(ppm)

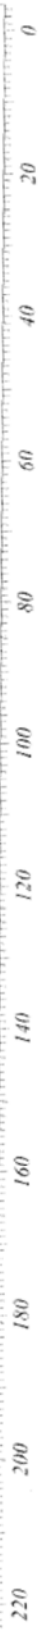

5'-Methoxy-2'-(pyridin-2-ylamino)-[1,1'-biphenyl]-4-yl acetate (12i):

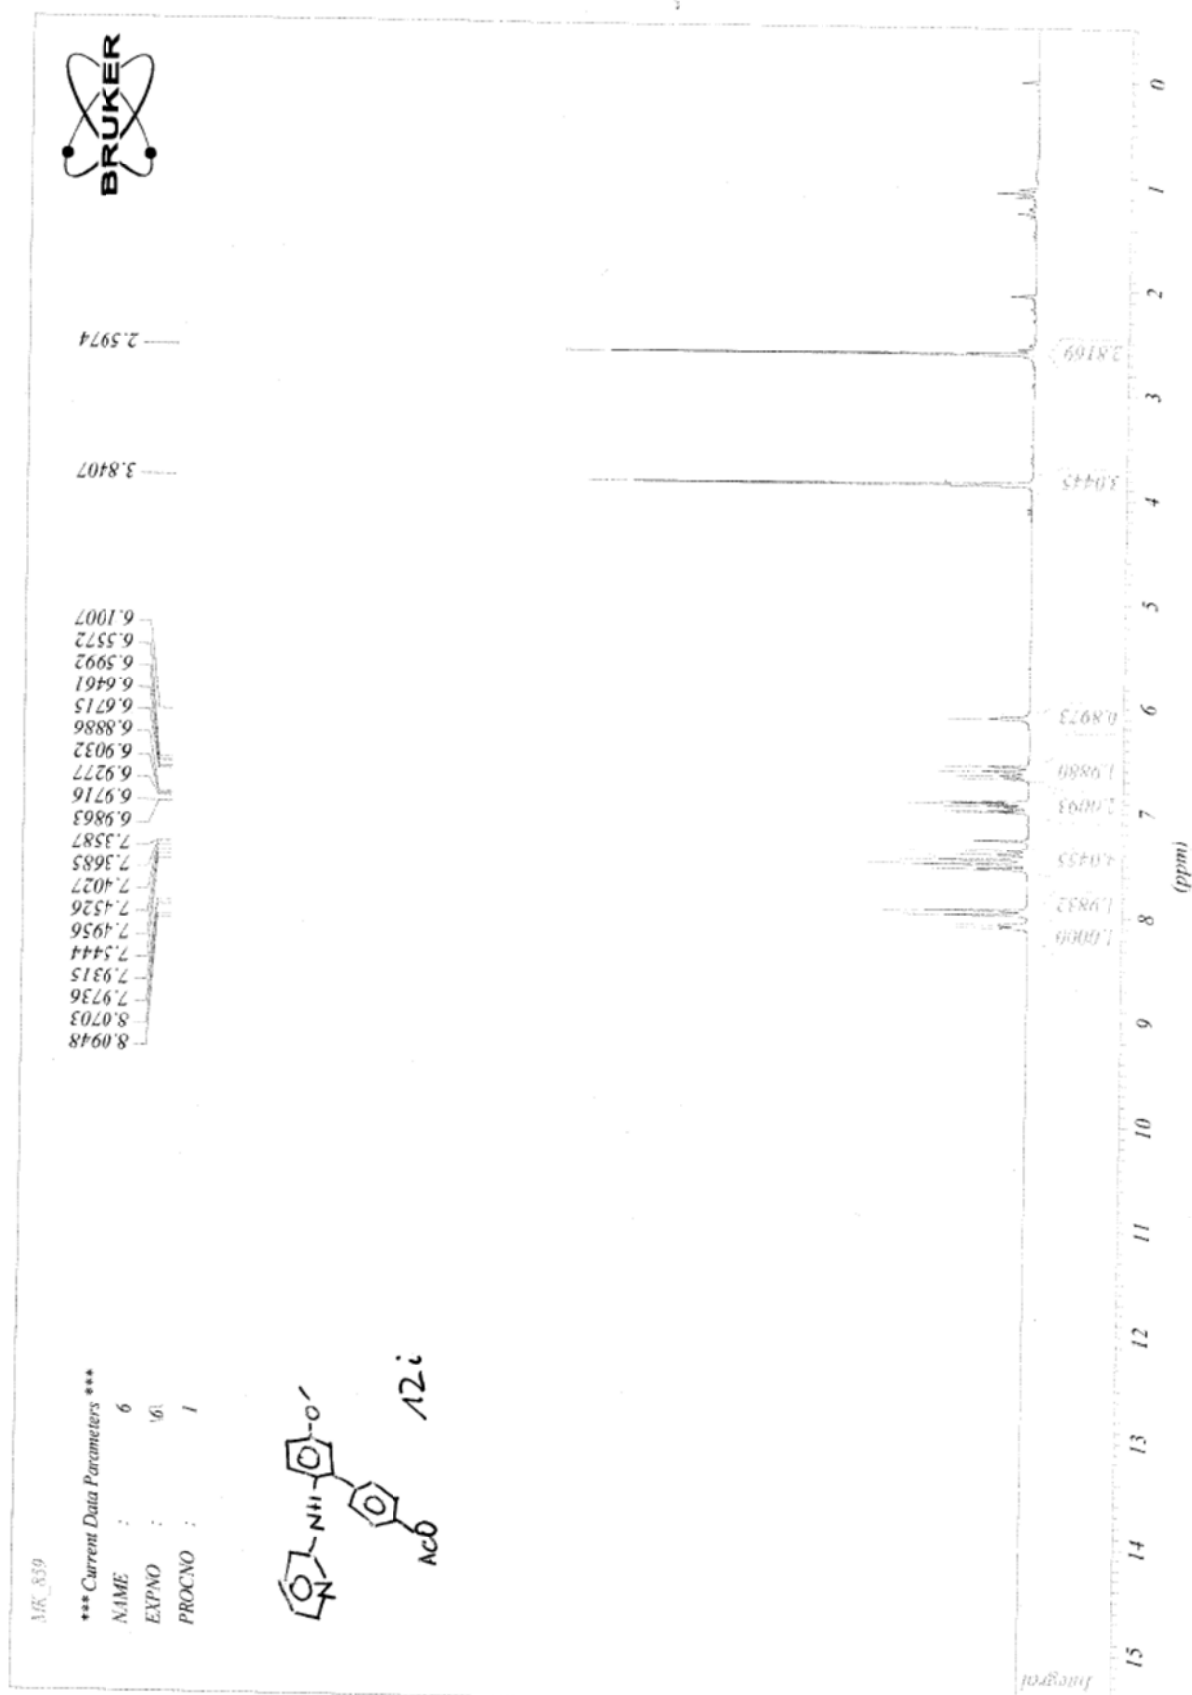

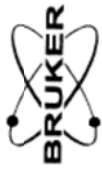

26.6570

55.6242

107.1854  
114.4360  
114.5343  
115.6573

126.1155  
128.6424  
129.3092  
130.1093  
136.0544  
136.2158  
137.6757  
143.8805  
148.4779

156.6339  
157.1674

197.6667

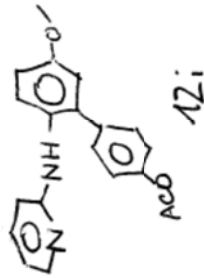

\*\*\* Current Data Parameters \*\*\*

NAME : 8  
EXPNO : 181  
PROCNO : 1

(ppm)

220 200 180 160 140 120 100 80 60 40 20 0

N-(4'-fluoro-5-methoxy-[1,1'-biphenyl]-2-yl)pyridin-2-amine (12j):

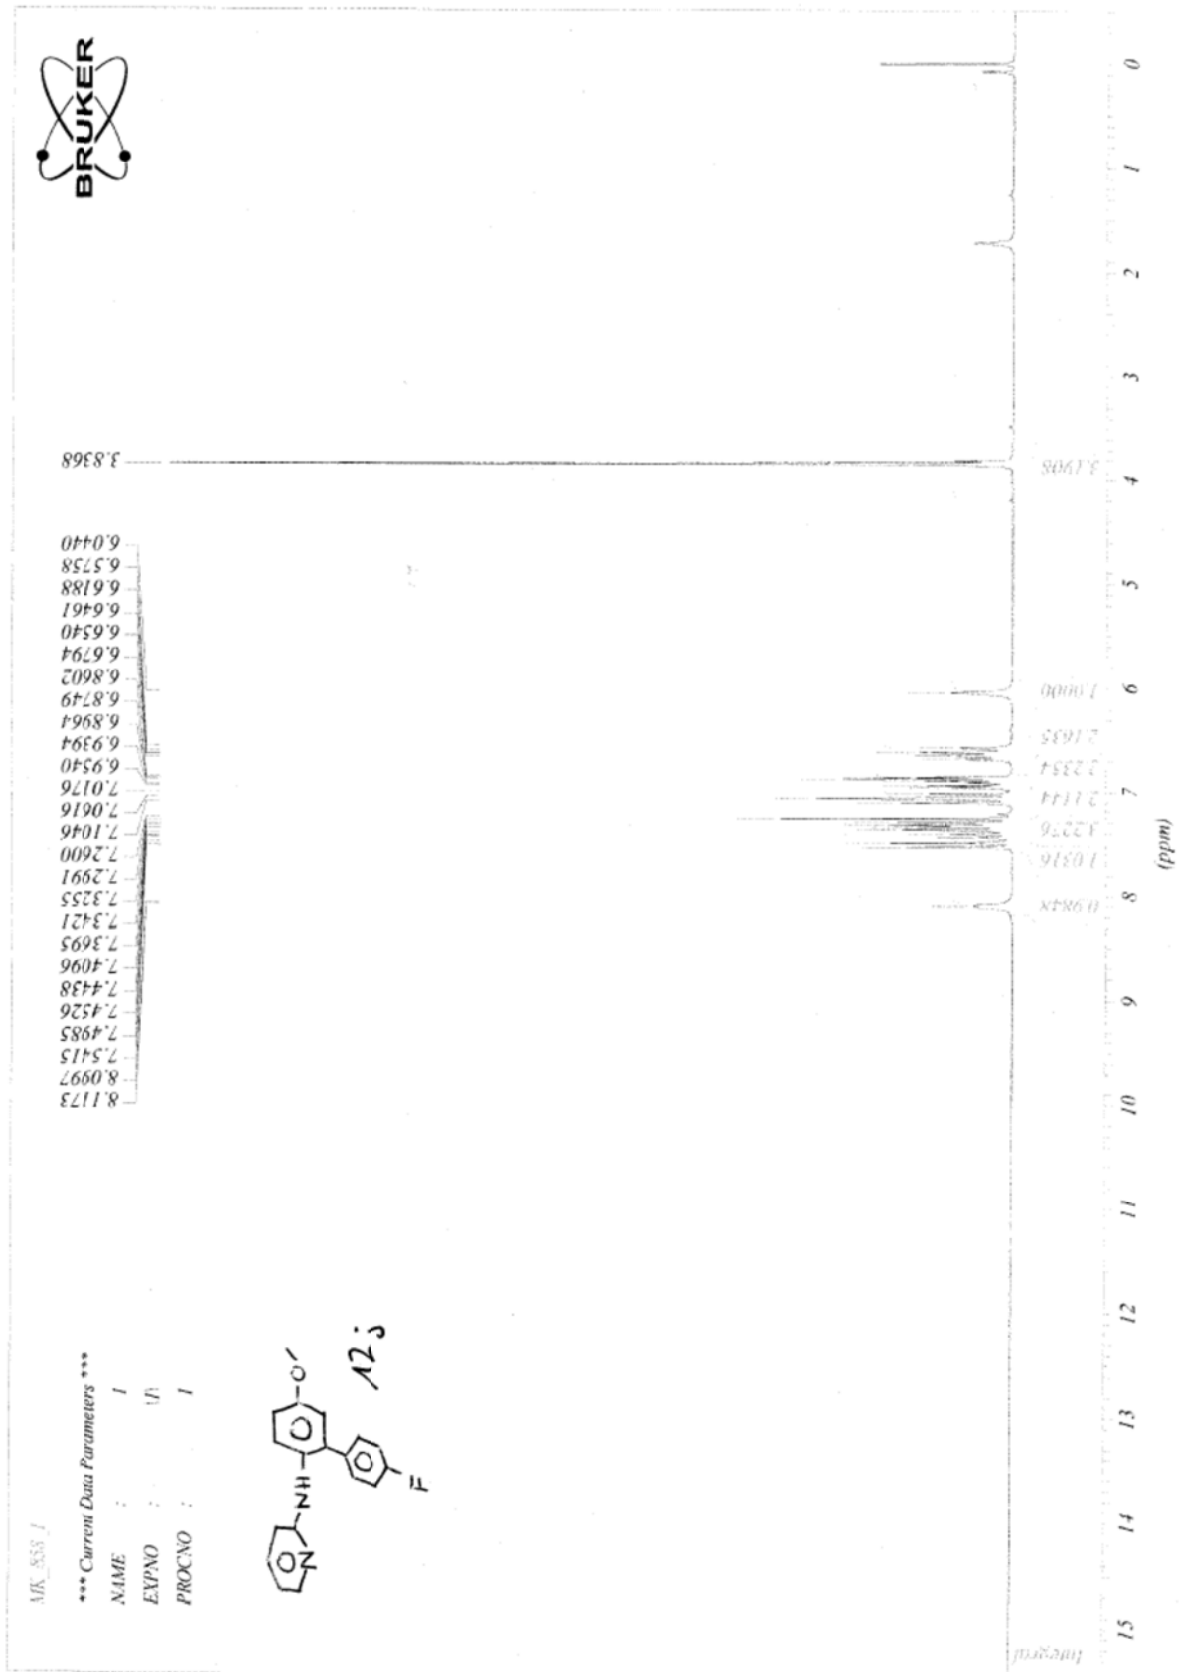

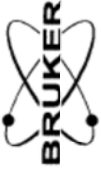

AK\_858\_1

\*\*\* Current Data Parameters \*\*\*

NAME : 4  
EXPNO : 4  
PROCNO : 1

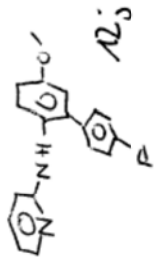

164.7619  
159.8556  
157.1533  
156.4374  
148.4288  
137.6407  
136.1597  
134.8261  
134.7629  
130.8112  
130.6568  
130.2006  
125.5681  
115.8819  
115.7907  
115.3625  
114.3377  
113.9026  
107.2205

55.5962

(ppm)

220 200 180 160 140 120 100 80 60 40 20 0

N-(5-chloro-[1,1'-biphenyl]-2-yl)pyridin-2-amine (12k):

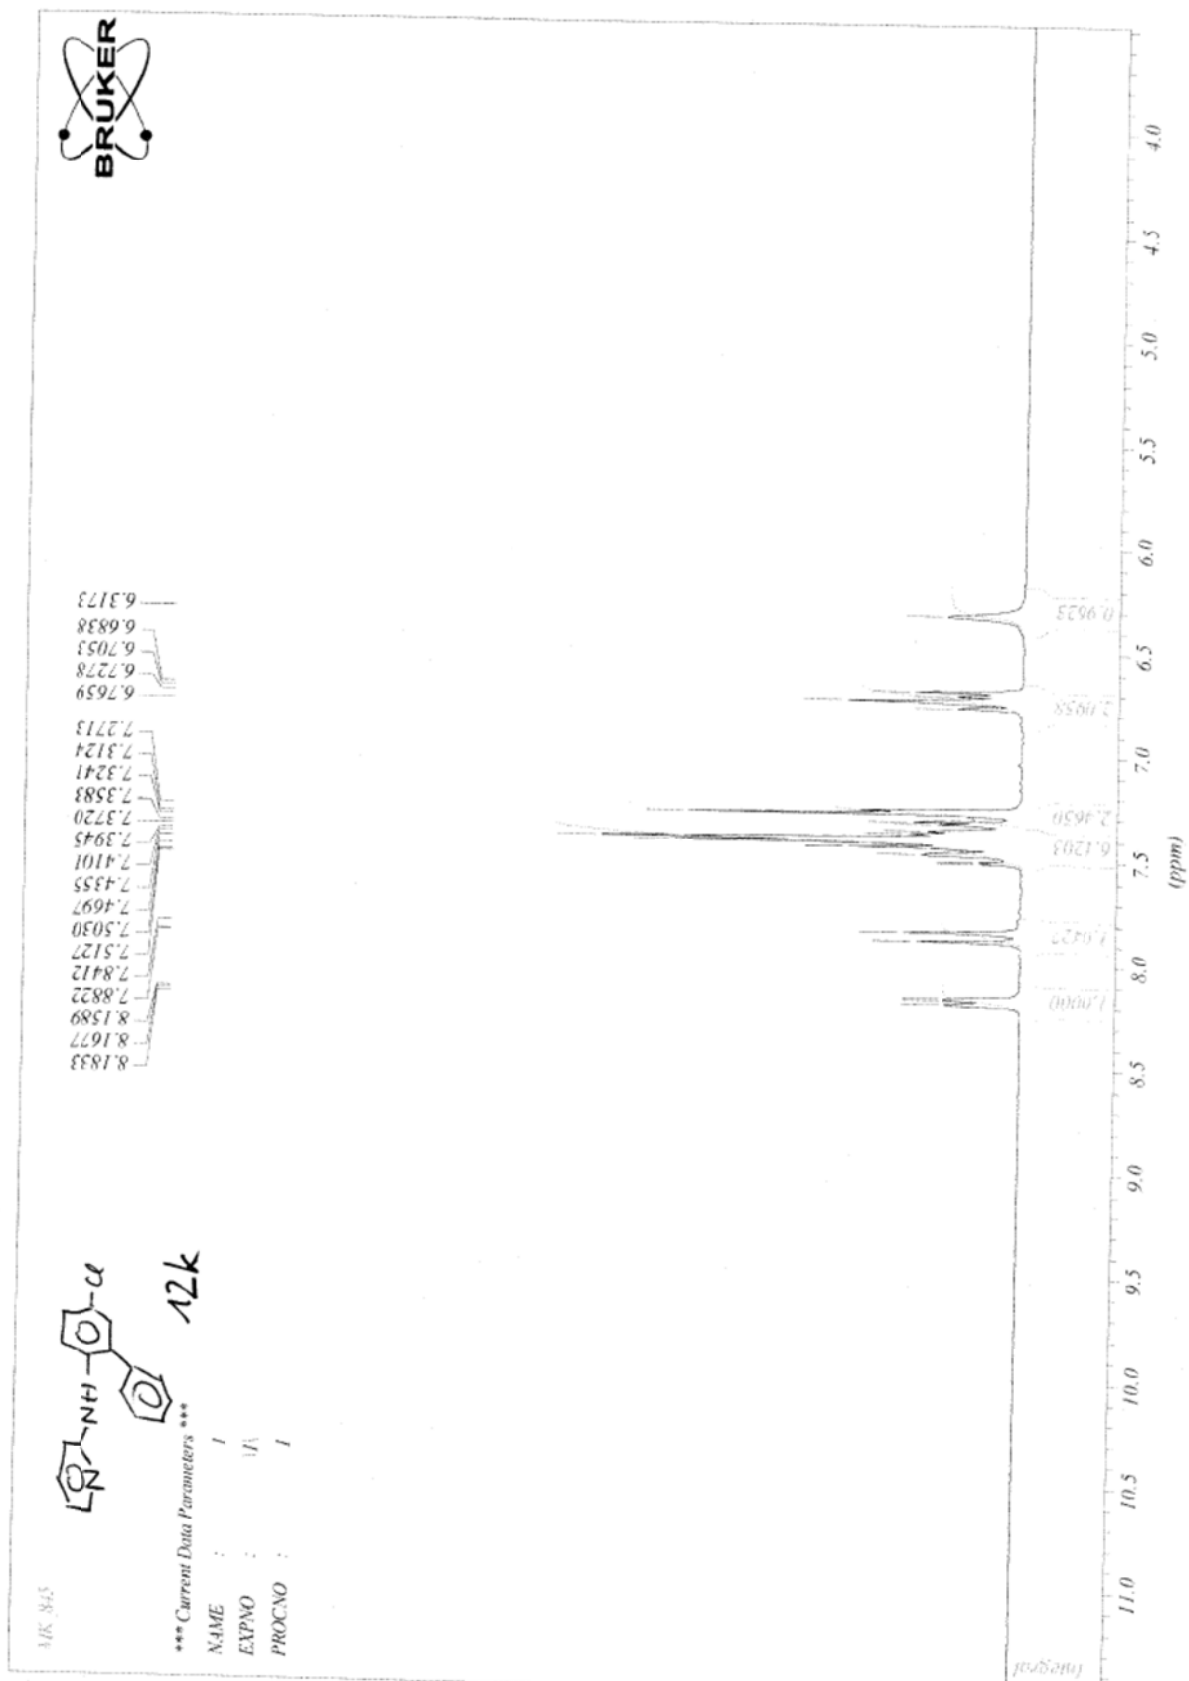

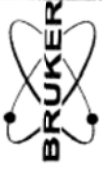

AK\_845

\*\*\* Current Data Parameters \*\*\*

NAME : 2  
EXPNO : 121  
PROCNO : 1

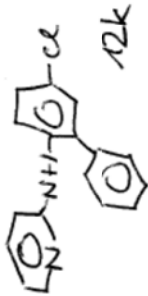

155.5039  
148.3586  
137.6898  
137.5494  
136.2018  
134.3909  
130.3409  
129.1618  
129.0495  
128.1019  
128.0598  
127.4281  
121.6024  
115.4327  
109.0876

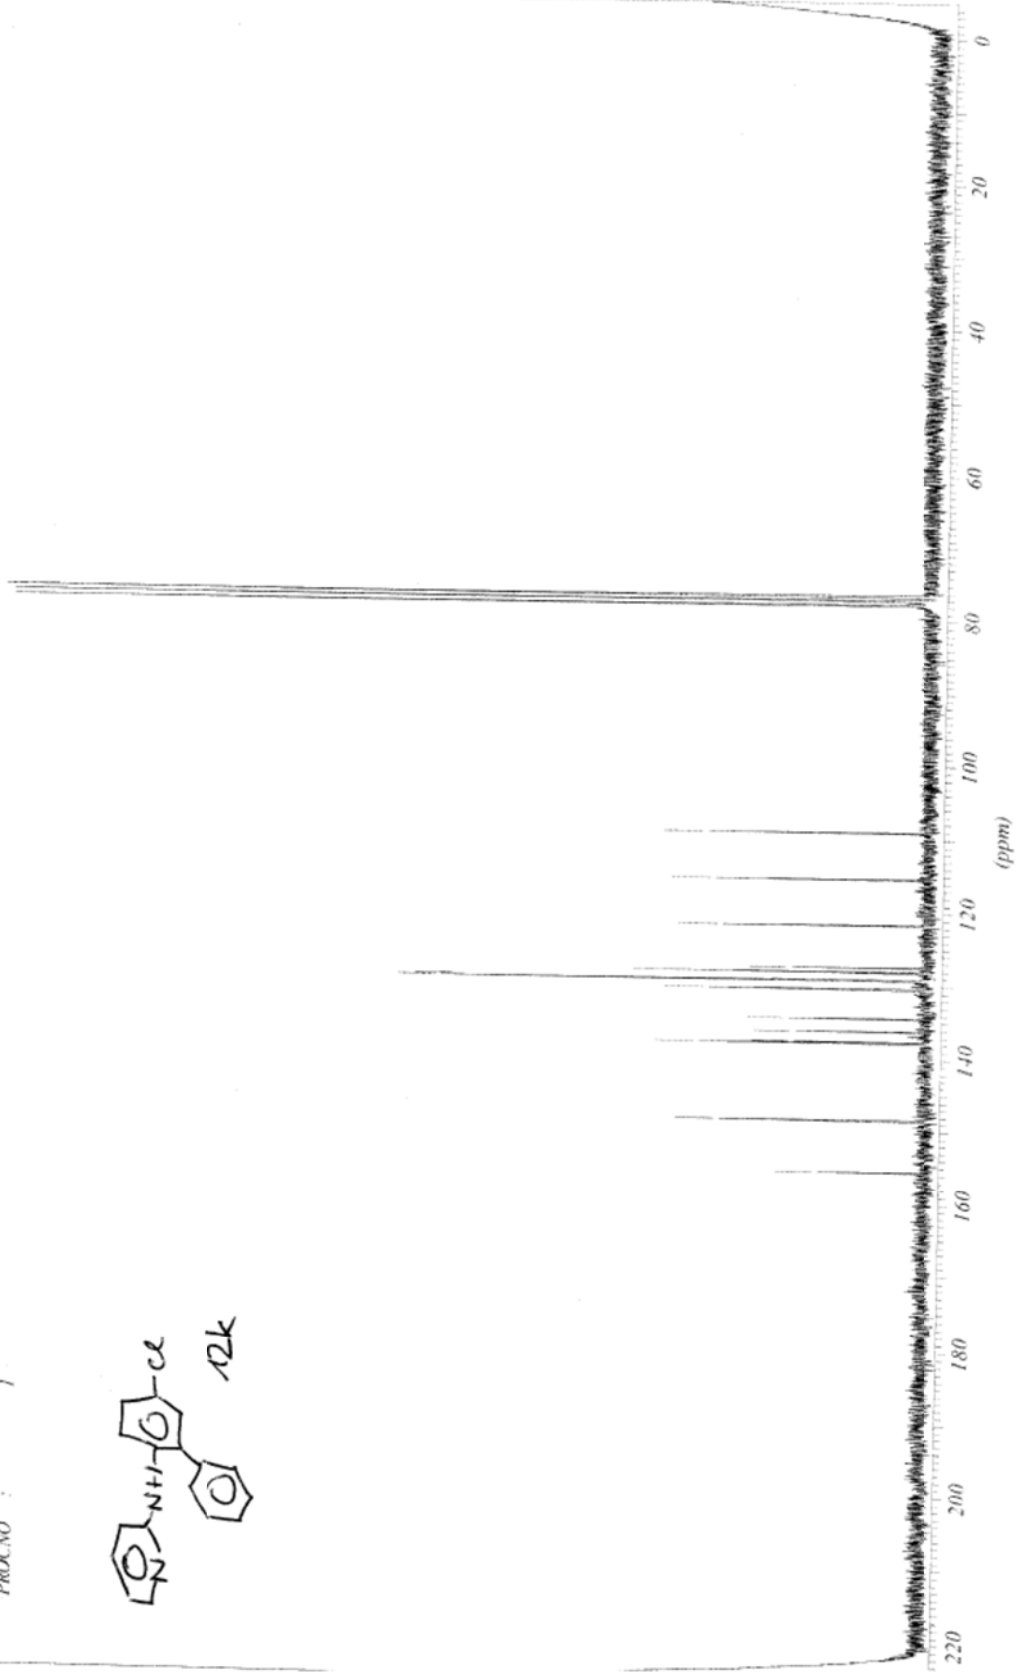



N-(5-chloro-4'-methyl-[1,1'-biphenyl]-2-yl)pyridin-2-amine (12l):

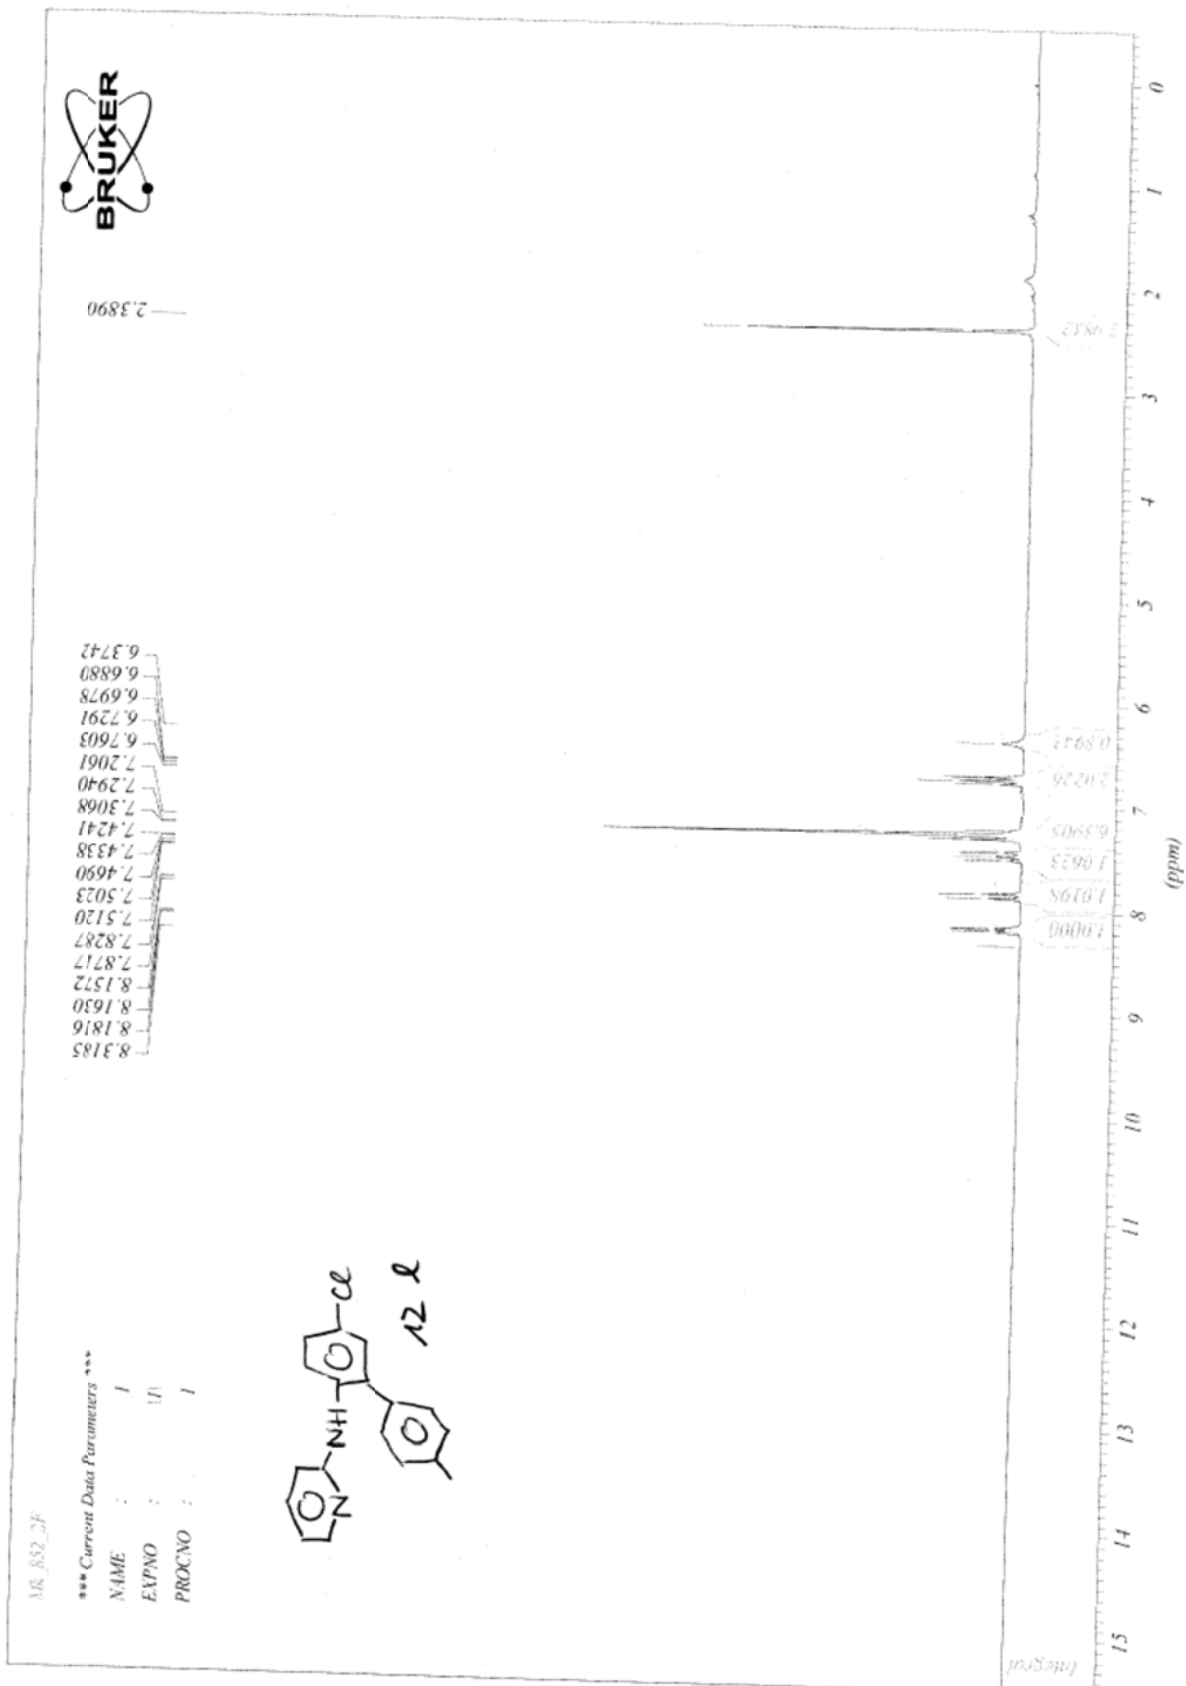

MK\_851

\*\*\* Current Data Parameters \*\*\*

NAME : KOSBEZ-1

EXPNO : 2

PROCNO : 1

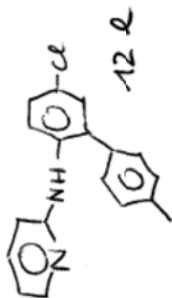

155.5320  
148.1972  
137.9284  
137.7038  
136.2018  
134.5242  
134.4470  
130.2988  
129.7303  
129.0003  
127.8282  
127.4000  
121.5322  
115.3134  
109.0595

21.1822

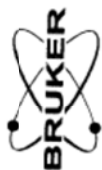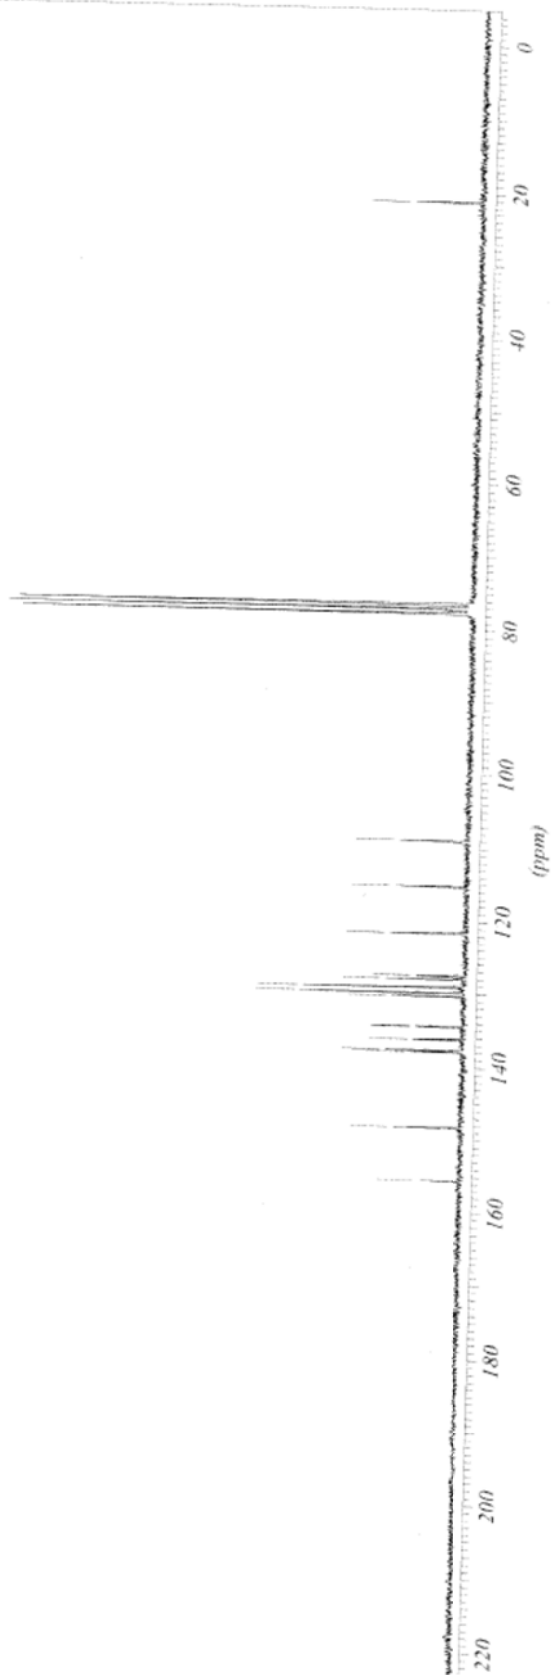

N-(4-chloro-[1,1'-biphenyl]-2-yl)pyridin-2-amine (12m):

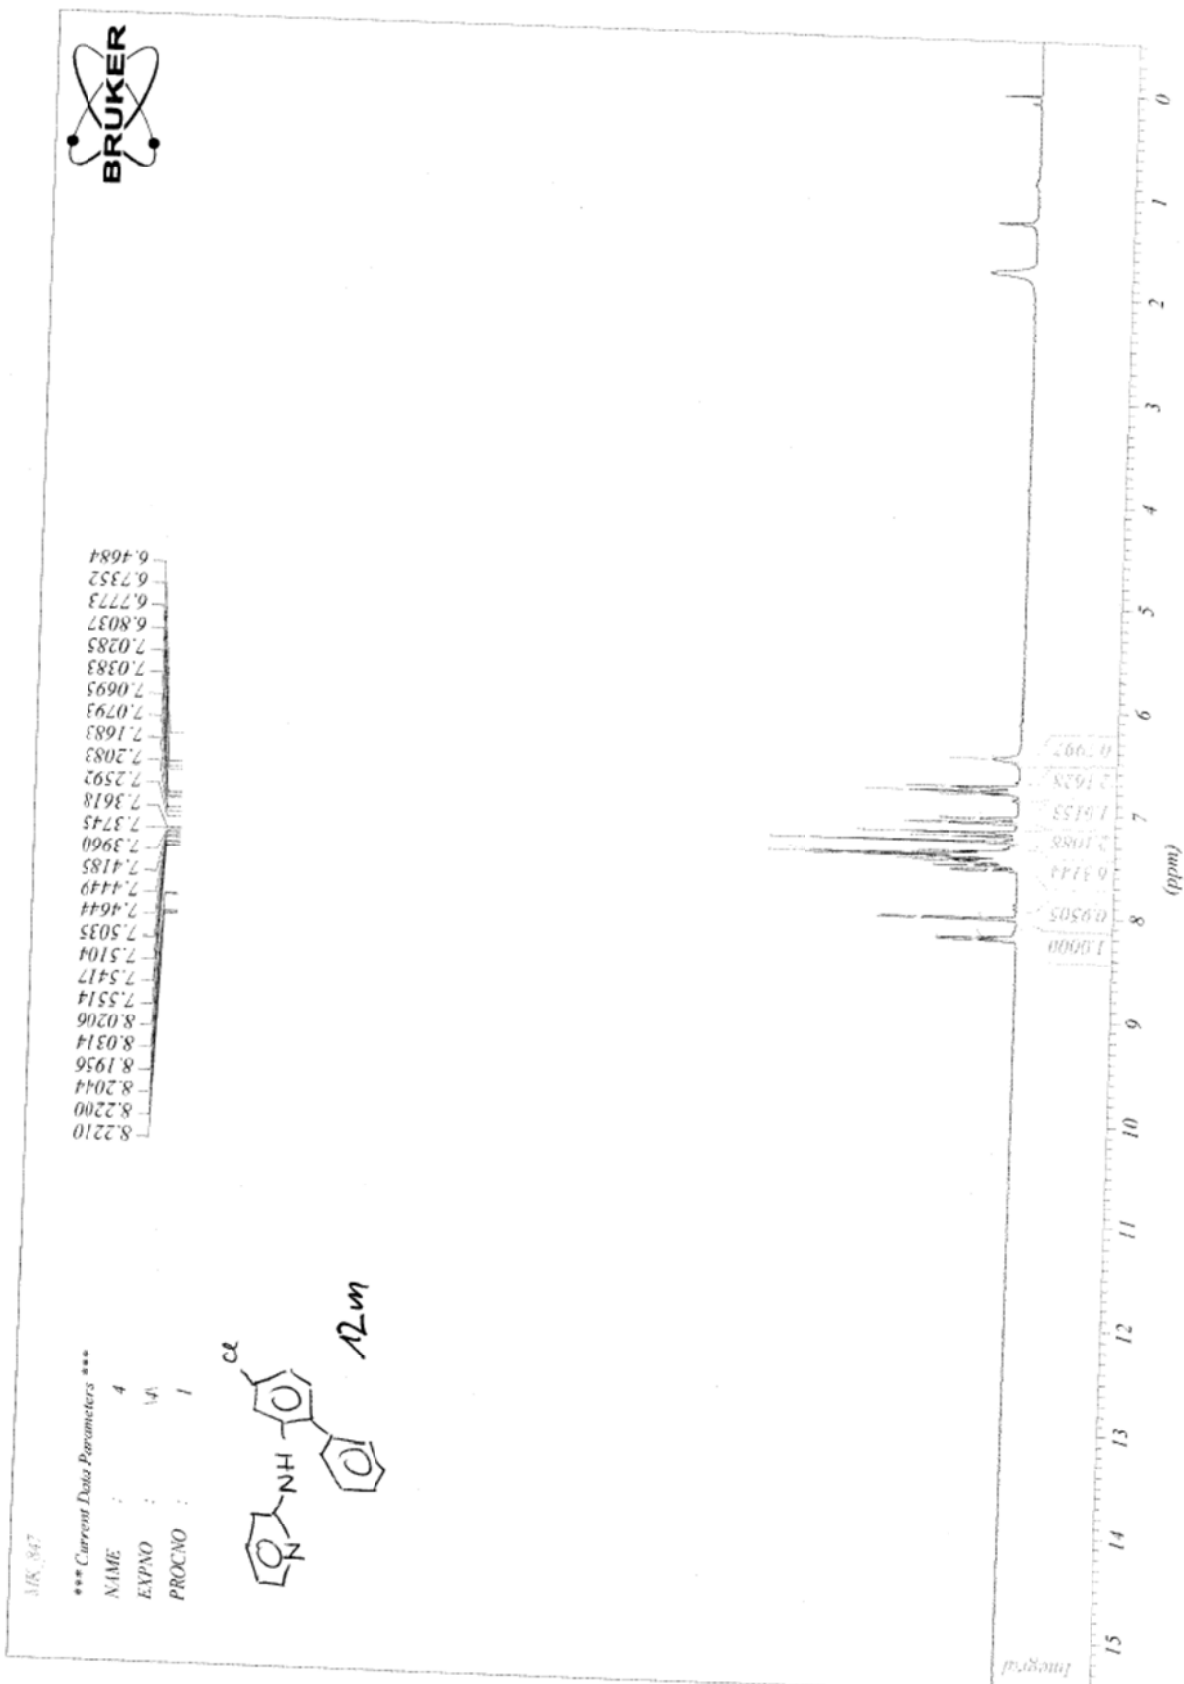

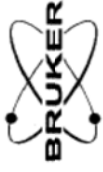

MR\_847

\*\*\* Current Data Parameters \*\*\*

NAME : 5  
EXPNO : (5)  
PROCNO : 1

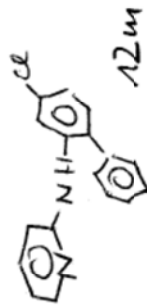

154.9353  
148.1480  
138.6795  
137.8372  
137.7530  
133.8434  
131.4780  
130.6287  
129.2881  
129.0775  
127.9405  
122.2832  
119.2791  
115.7486  
109.6421

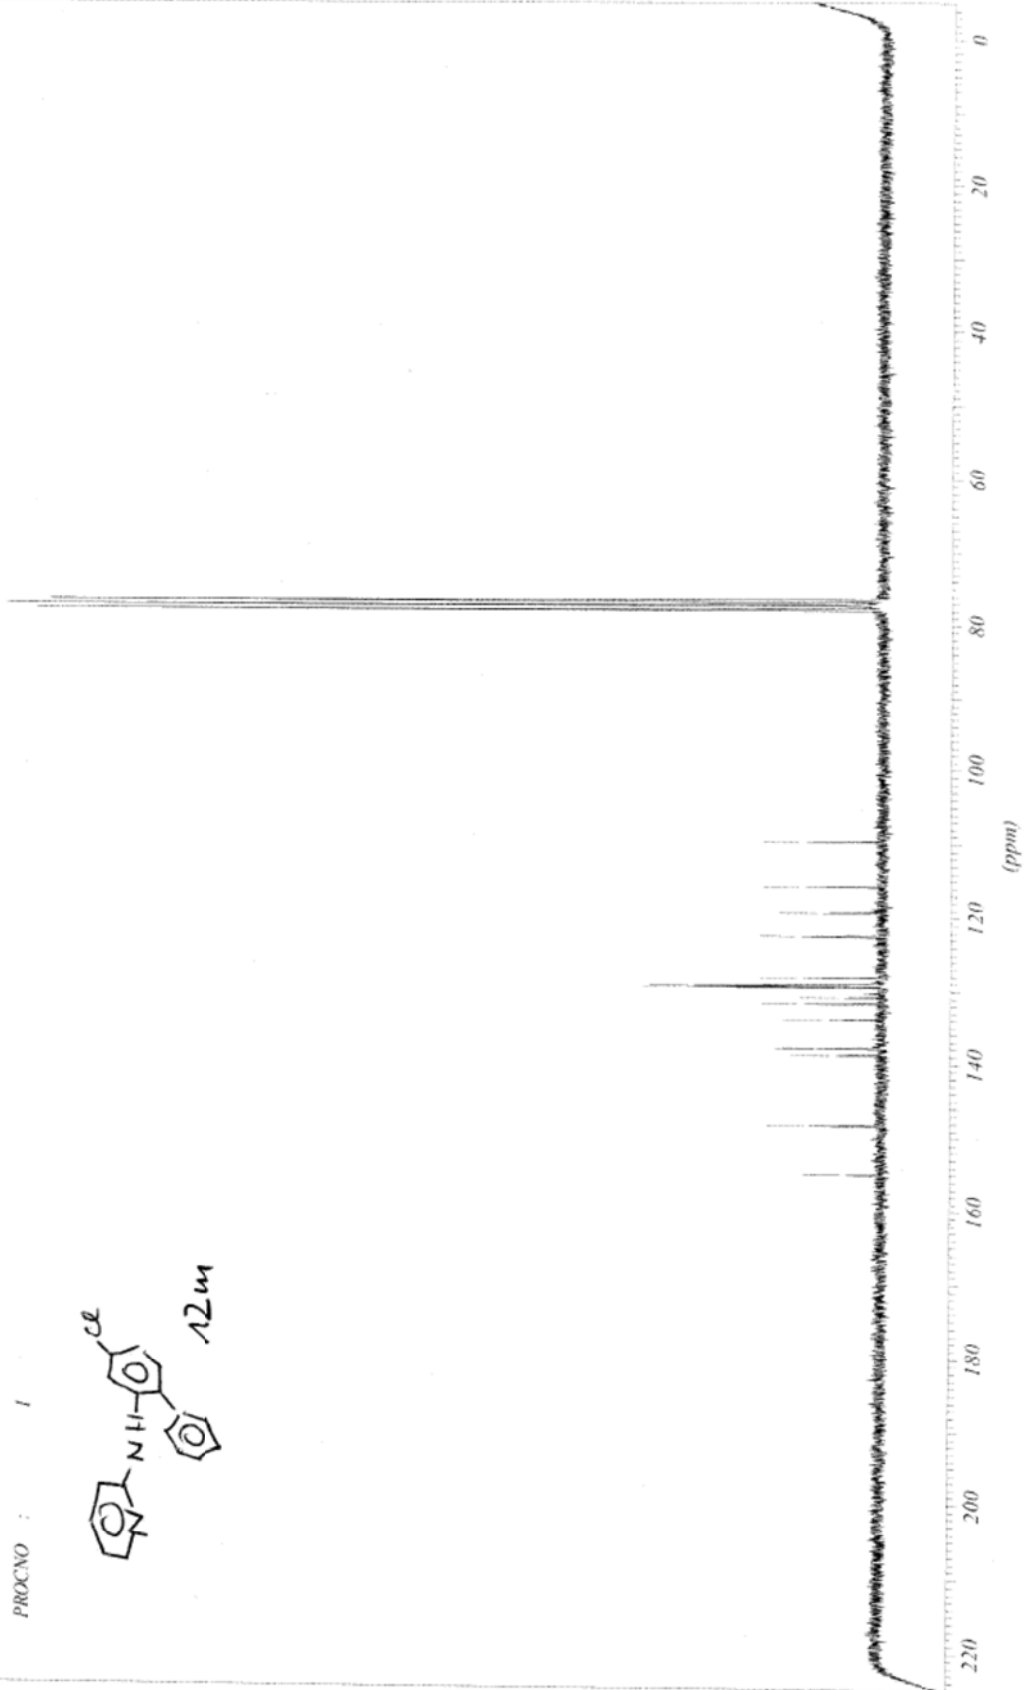

Ethyl 6-(pyridin-2-ylamino)-[1,1'-biphenyl]-3-carboxylate (12n):

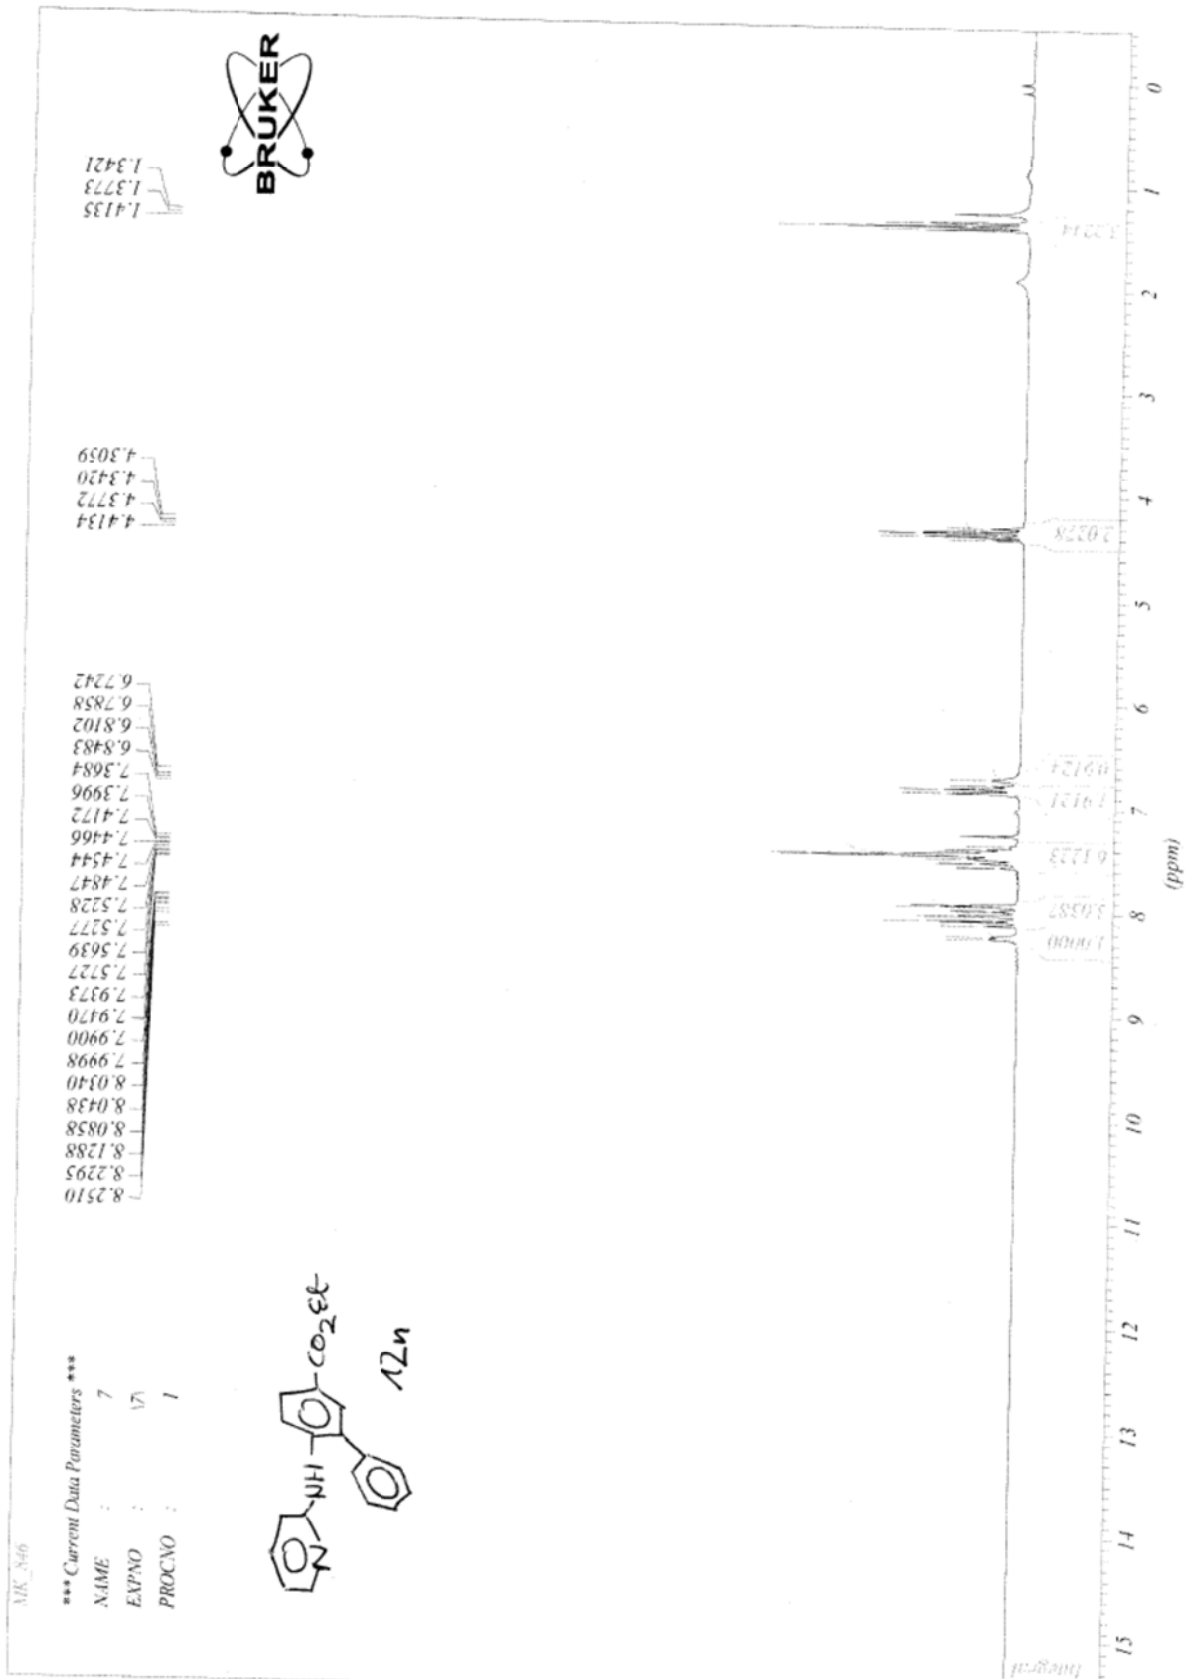

PCL XL Error

Subsystem:  
Error:  
Operator:  
Position:

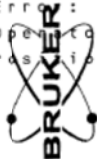

I/O  
InputReadError  
ReadChar  
12285

14.4019

60.6709

110.6317

116.3522

117.0751

123.3220

128.1019

129.2039

129.4144

130.1163

130.8603

132.0957

137.8091

142.0064

148.2323

154.4230

166.3973

\*\*\* Current Data Parameters \*\*\*  
NAME : 8  
EXPNO : 8  
PROCNO : 1

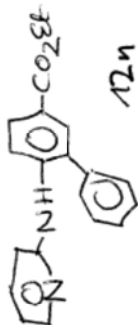

(ppm)

0

20

40

60

80

100

120

140

160

180

200

220

N-([1,1'-biphenyl]-2-yl)-3-methylpyridin-2-amine (12o):

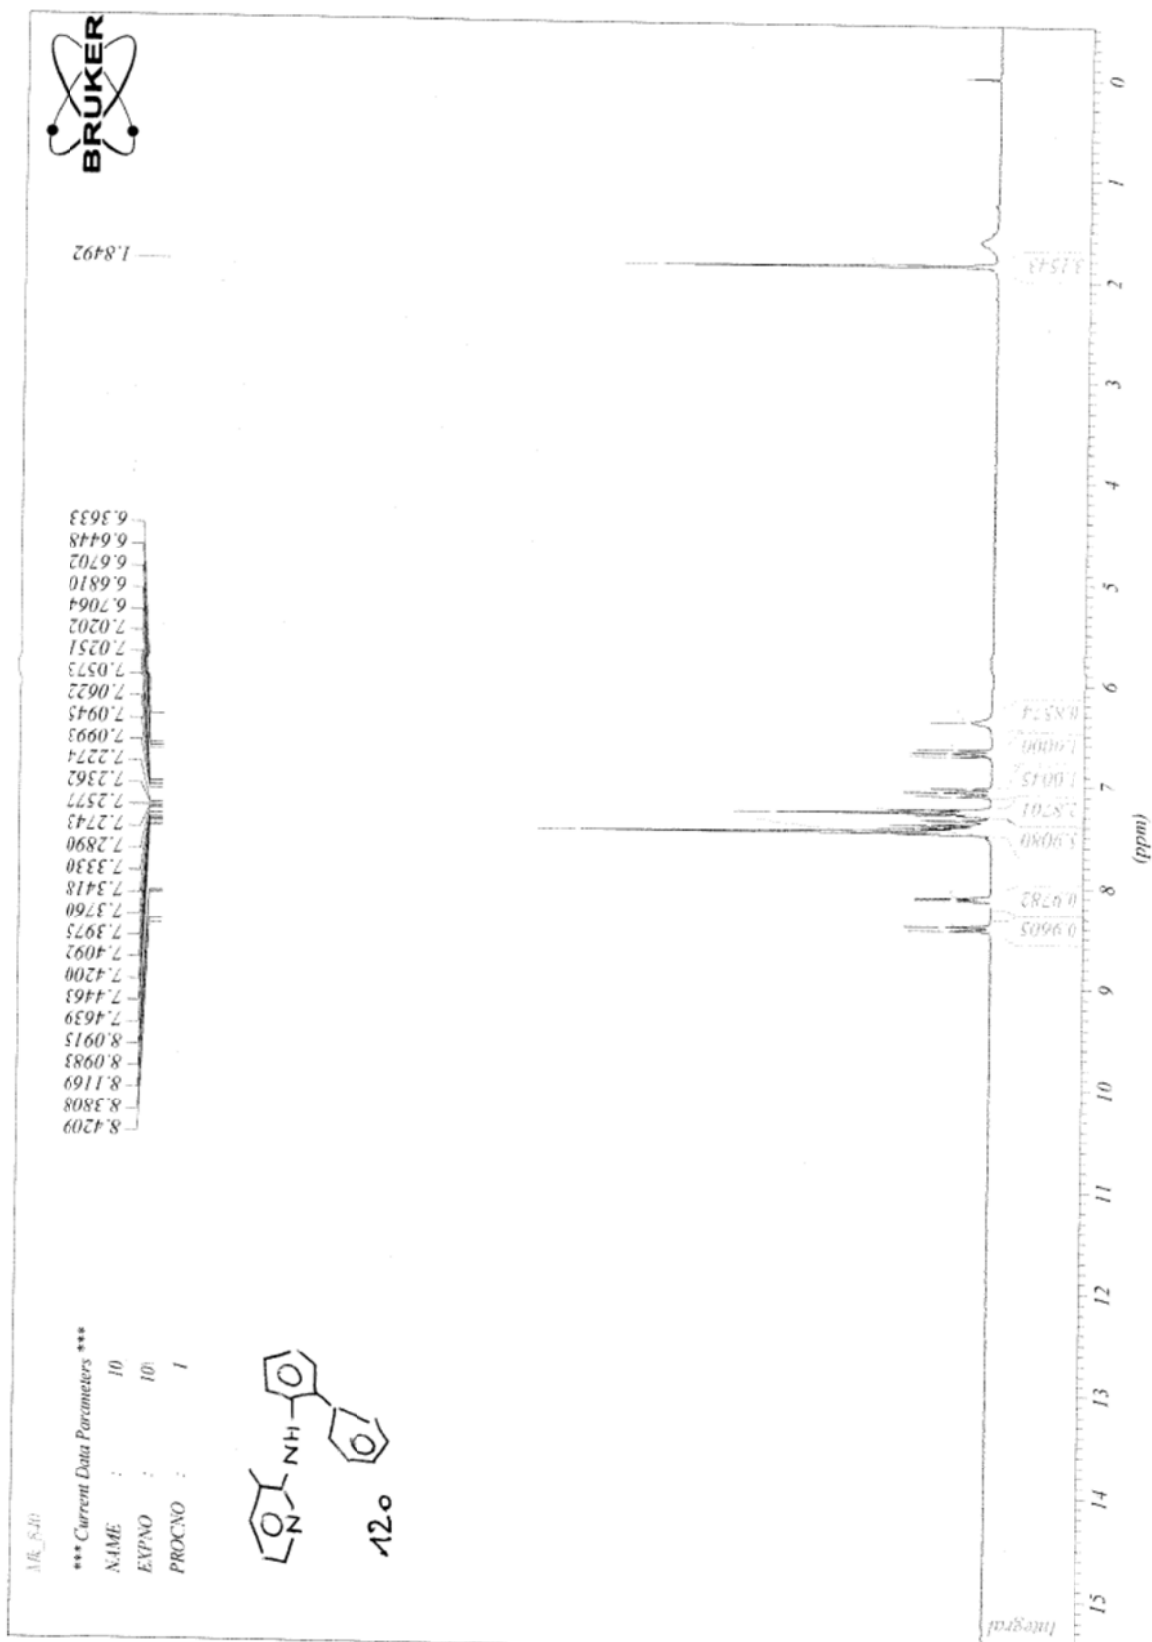

MR\_S40

\*\*\* Current Data Parameters \*\*\*

NAME : II  
EXPNO : 111  
PROCNO : 1

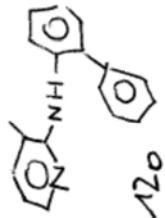

153.9176  
145.1158  
139.0374  
137.7530  
131.6324  
129.8917  
129.4425  
128.9512  
128.2844  
127.6597  
121.7076  
119.9740  
118.4859  
115.0677

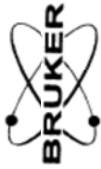

16.9428

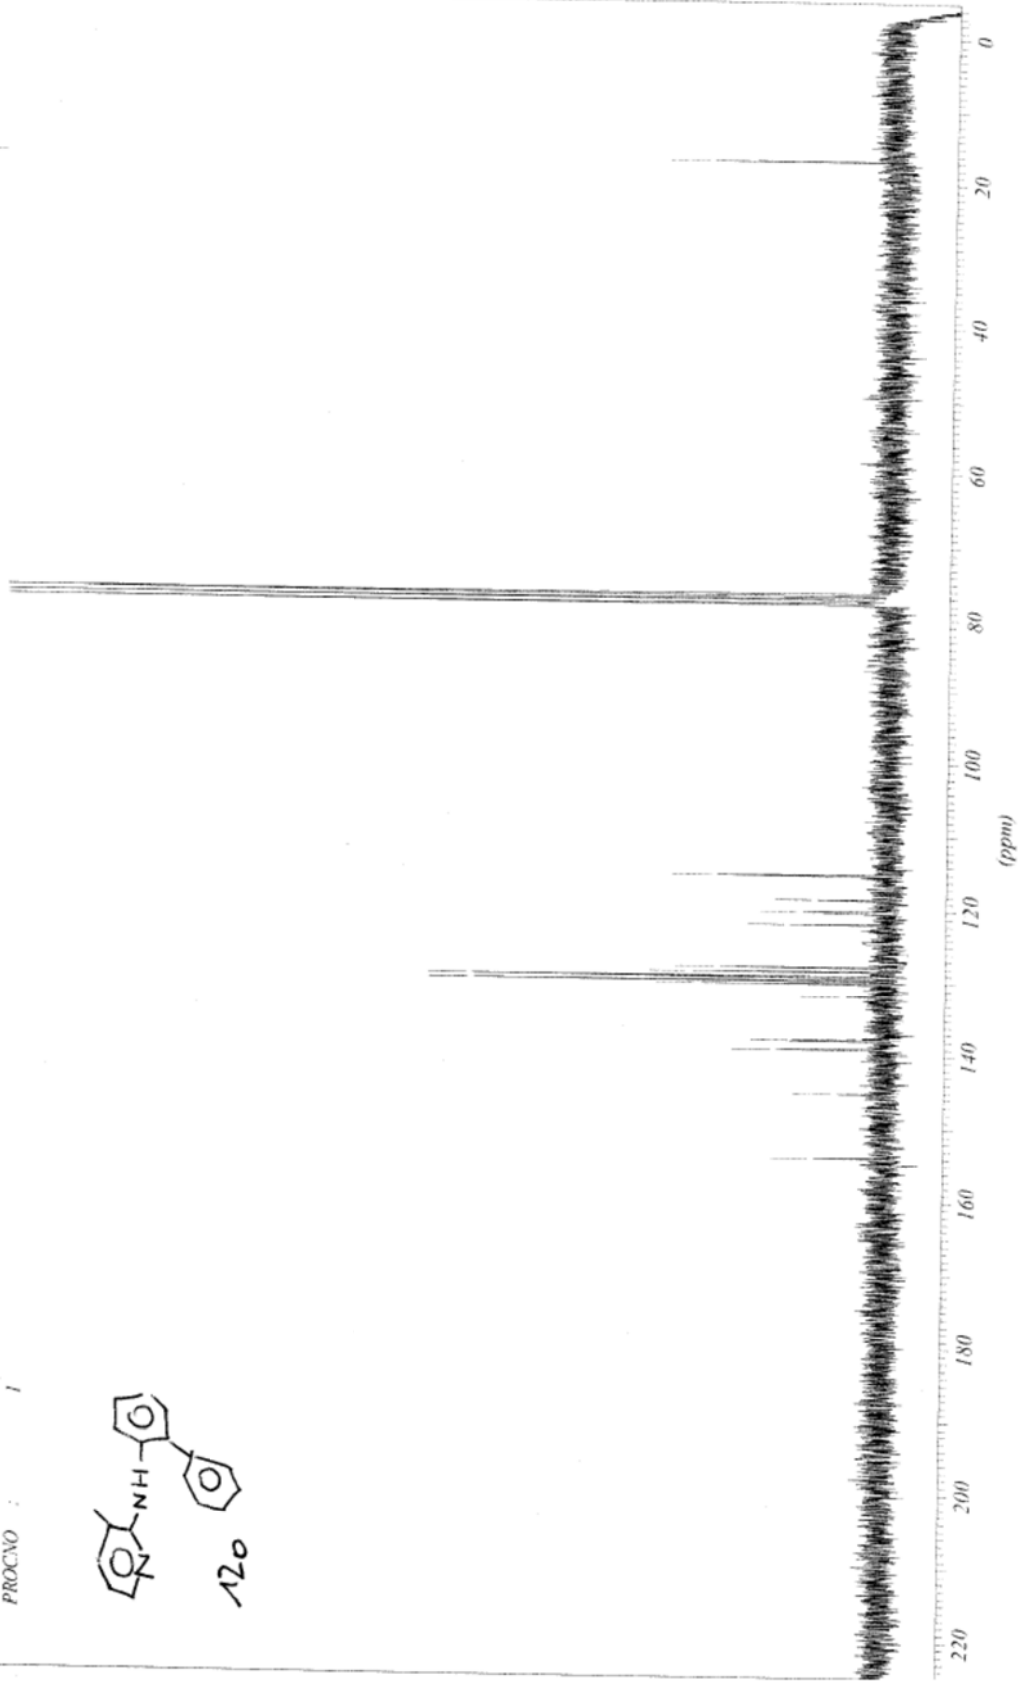



N-([1,1':3',1''-terphenyl]-2'-yl)-3-methylpyridin-2-amine (13):

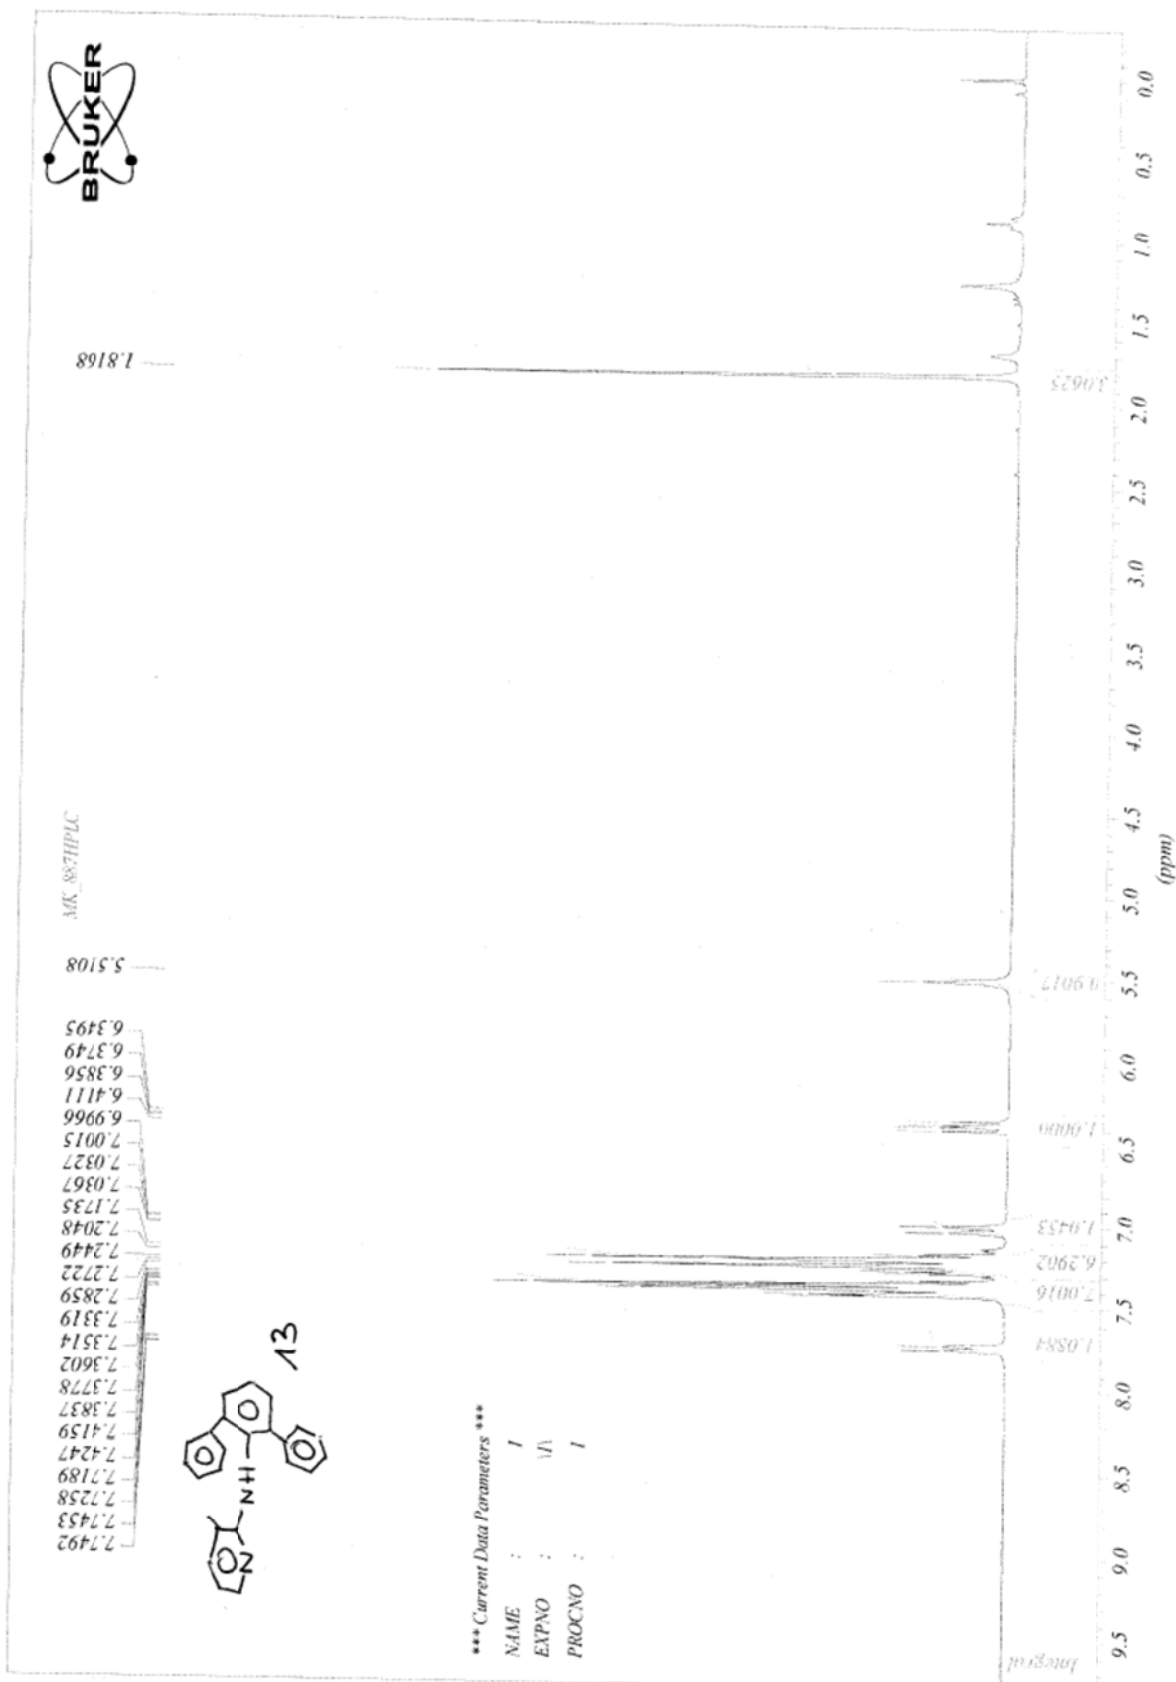

MK\_880-1PLC

\*\*\* Current Data Parameters \*\*\*

NAME : 21

EXPNO : 21

PROCNO : 1

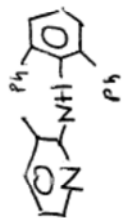

13

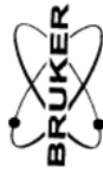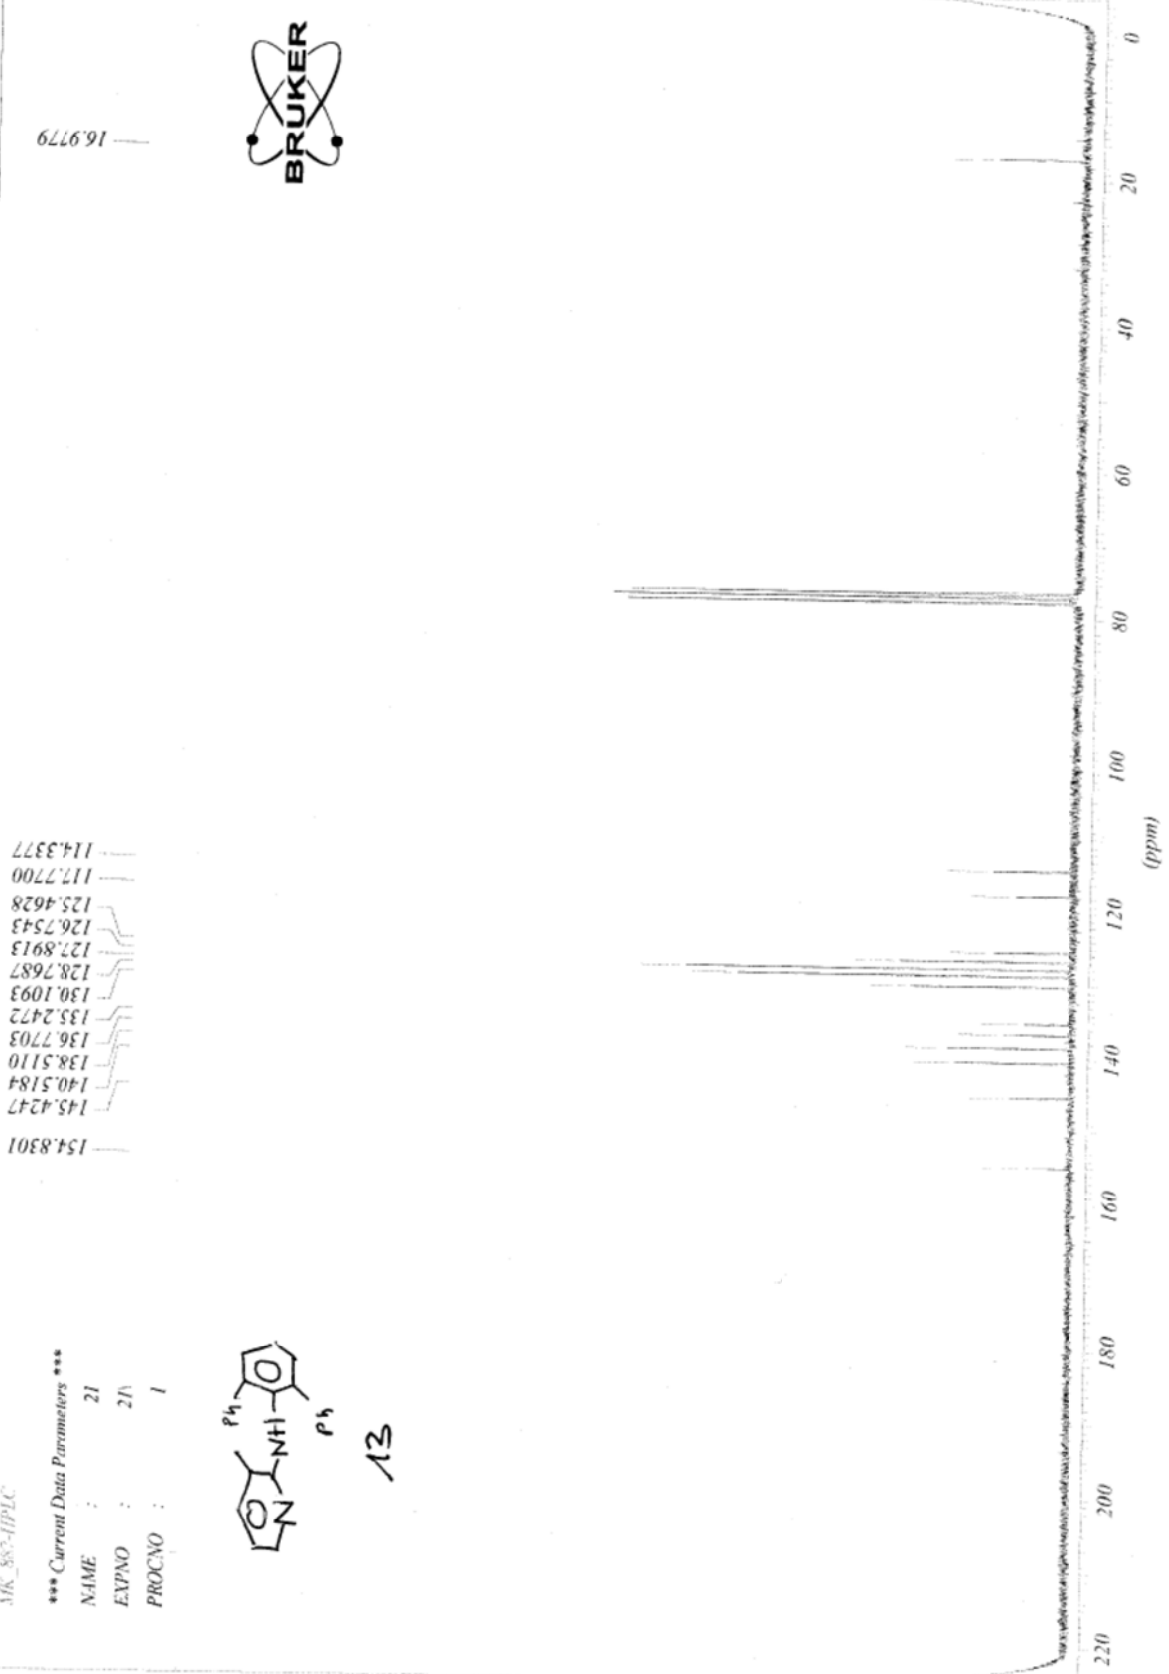

Supplement: cctc0004-1345-SD1.pdf [file cctc0004-1345-SD1.pdf]
